1 **Detectability of runs of homozygosity is influenced by analysis parameters as well as**  
2 **population-specific demographic history**

3 Avril M. Harder<sup>1\*</sup>, Kenneth B. Kirksey<sup>2</sup>, Samarth Mathur<sup>3</sup>, Janna R. Willoughby<sup>1</sup>

4 1. College of Forestry, Wildlife and Environment, Auburn University, Auburn, Alabama, USA

5 2. Walker College of Business, Appalachian State University, Boone, North Carolina, USA

6 3. Department of Evolution, Ecology, and Organismal Biology, The Ohio State University,  
7 Columbus, Ohio, USA

8 \*Author for correspondence: Avril M. Harder, College of Forestry, Wildlife and Environment,  
9 Auburn University, Auburn, Alabama, USA, (773) 688-8564, [avrilharder@gmail.com](mailto:avrilharder@gmail.com)

## 10 **Abstract**

11 Wild populations are increasingly threatened by human-mediated climate change and land use  
12 changes. As populations decline, the probability of inbreeding increases, along with the potential  
13 for negative effects on individual fitness. Detecting and characterizing runs of homozygosity  
14 (ROHs) is a popular strategy for assessing the extent of individual inbreeding present in a  
15 population and can also shed light on the genetic mechanisms contributing to inbreeding  
16 depression. However, selecting an appropriate program and parameter values for such analyses is  
17 often difficult for species of conservation concern, for which little is often known about  
18 population demographic histories or few high-quality genomic resources are available. Herein,  
19 we analyze simulated and empirical data sets to demonstrate the downstream effects of program  
20 selection on ROH inference. We also apply a sensitivity analysis to evaluate the effects of  
21 various parameter values on ROH-calling results and demonstrate its utility for parameter value  
22 selection. We show that ROH inferences can be biased when sequencing depth and the  
23 distribution of ROH length is not interpreted in light of program-specific tendencies. This is  
24 particularly important for the management of endangered species, as some program and  
25 parameter combinations consistently underestimate inbreeding signals in the genome,  
26 substantially undermining conservation initiatives. Based on our conclusions, we suggest using a  
27 combination of ROH detection tools and ROH length-specific inferences to generate robust  
28 population inferences regarding inbreeding history. We outline these recommendations for ROH  
29 estimation at multiple levels of sequencing effort typical of conservation genomics studies.

30 **Running title:** Testing runs of homozygosity inference tools

31 **Key words:** inbreeding, population genomics, PLINK, BCFtools

## 32 **Introduction**

33 Climate change and expanding human land use are increasingly partitioning wild populations  
34 into smaller and smaller areas of available and suitable habitat, often leading to declining  
35 populations sizes (Diffenbaugh & Field, 2013; Haddad et al., 2015). Decreases in population size  
36 can lead to increased inbreeding, which has been reported to have negative fitness consequences  
37 for inbred individuals in many wild populations (*e.g.*, Crnokrak & Roff, 1999; Robinson et al.,  
38 2019). When inbreeding depression is sufficiently severe, populations can be threatened with  
39 extirpation; thus, assessing inbreeding extent is crucial for understanding and mitigating risk in  
40 small populations of conservation concern. Prior to widespread application of whole-genome  
41 sequencing strategies to non-model species, genetic estimates of inbreeding were obtained using  
42 allozyme or microsatellite data or inferred from known pedigrees (Gibbs & Grant, 1989; Liberg  
43 et al., 2005; Saccheri et al., 1998; Slate, Kruuk, Marshall, Pemberton, & Clutton-Brock, 2000).  
44 These studies have been critically important to understanding the genetic dynamics of stable and  
45 shrinking populations and have led to increasing recognition of inbreeding depression's  
46 prevalence and ability to affect wild population persistence (Keller & Waller, 2002; O'Grady et  
47 al., 2006). However, applying whole genome sequencing strategies to identify runs of  
48 homozygosity (ROHs; genomic regions where both inherited haplotypes are identical) opens up  
49 lines of inquiry previously not accessible via pedigree- or microsatellite-based studies (Kardos,  
50 Taylor, Ellegren, Luikart, & Allendorf, 2016).

51 One long-standing question important for ongoing conservation efforts is whether  
52 inbreeding depression primarily occurs as a result of increasing homozygosity of recessive  
53 deleterious alleles or absences of heterozygote advantage (Hedrick & Garcia-Dorado, 2016).  
54 Analyses of genome-wide data have addressed parts of this question by quantitatively

55 documenting and illustrating inbreeding depression (Huisman, Kruuk, Ellis, Clutton-Brock, &  
56 Pemberton, 2016; Harrisson et al., 2019; Stoffel, Johnston, Pilkington, & Pemberton, 2021) and  
57 identifying support for increasing homozygosity of strongly deleterious mutations as a genetic  
58 mechanism of inbreeding depression (Robinson et al., 2019; Stoffel et al., 2021). Theoretical  
59 predictions regarding the genetic mechanisms of inbreeding depression mitigation have also been  
60 empirically tested. For example, coupling genomic and fitness data reveals positive correlations  
61 between ROH length and mutational load resulting from genetic purging (Stoffel, Johnston,  
62 Pilkington, & Pemberton, 2021; Szpiech et al., 2013), suggesting that ROH length distribution  
63 data can provide actionable insight for managers. Analyses of ROHs in ancient samples have  
64 even clarified the genomic and demographic changes preceding historic species extinction events  
65 (Liu et al., 2021; Palkopoulou et al., 2015). Despite these advances and insights, causative  
66 mechanisms of inbreeding depression remain unclear for many taxonomic groups, and this can  
67 hinder management efforts that seek to mitigate fitness declines in wild populations.

68         Estimating ROHs can provide crucial insights into populations' evolutionary histories,  
69 but these histories can in turn affect which ROH-calling software and combination of parameter  
70 values are most appropriate. For example, the settings best suited for inferring ROHs in a small,  
71 long-isolated population experiencing high levels of inbreeding would not be suitable for  
72 individuals sampled from a large, genetically diverse population because underlying sources of  
73 error in these two scenarios are very different (*e.g.*, differences in ROH length distributions,  
74 numbers of variable sites, expected minor allele frequencies; Ceballos, Joshi, Clark, Ramsay, &  
75 Wilson, 2018). While some studies include comparisons of results from multiple programs or  
76 parameter value combinations (*e.g.*, Saremi et al., 2019; Grossen, Guillaume, Keller, & Croll,  
77 2020; von Seth et al., 2021; Mueller et al., 2022), many more studies rely on default settings and

78 do not explore the effects of varying these parameter values on their results. Without extensive  
79 knowledge of a population's demographic history (*e.g.*, prevalence and degree of  
80 consanguineous mating or immigration), it can be challenging to determine the most appropriate  
81 combination of parameter values, and it is always impossible to know how close the resulting  
82 estimates approximate reality.

83         We address this challenge by leveraging simulated and empirical genomic sequencing  
84 data to compare ROH identification programs and test a systematic process for determining  
85 software parameter values. We focus on whole-genome sequencing data because although  
86 previous studies have examined ROH inference for data sets with lower marker densities  
87 (Ceballos, Hazelhurst, & Ramsay, 2018; Duntsch, Whibley, Brekke, Ewen, & Santure, 2021;  
88 Meyermans, Gorssen, Buys, & Janssens, 2020), the insights from these previous works do not  
89 cover the spectrum of issues encountered when analyzing whole genome data. Specifically, we  
90 test a wide array of setting combinations for two programs commonly used in population  
91 genomic studies—PLINK and BCFtools/RoH—and, for PLINK, apply a sensitivity analysis to  
92 evaluate the effects of parameter values on ROH inference. Based on these results, we outline a  
93 set of recommendations for ROH estimation at multiple levels of sequencing effort typical of  
94 conservation genomics studies. These guidelines are particularly relevant when population  
95 histories are poorly understood or when a reference genome assembly is more fragmented than  
96 for a typical model species—two common conditions for species that are targets of conservation  
97 action.

## 98 **Methods**

### 99 *Part I: Simulated data*

#### 100 Data generation and genotype calling

101 We used SLiM v3.6 and modifications of Recipe 7.3 distributed with SLiMgui to simulate a  
102 population ( $N = 10,000$ ), wherein each individual consisted of a homologous pair of 30-Mb  
103 chromosomes (Haller & Messer, 2019a, 2019b). The population was simulated for 10,000  
104 generations, followed by a bottleneck to 250 individuals that was sustained for 5,000 additional  
105 generations. Recombination rate ( $1 \times 10^{-7}$  per site per generation), base mutation rate ( $1.75 \times 10^{-7}$   
106 per site per generation), and population parameters were selected to produce a final population  
107 with  $F_{ROH}$  values ranging from 0.075 to 0.440 when considering ROHs  $\geq 100$  kb in length. The  
108 VCF file output from SLiM was converted to FASTA sequence files using a custom script in R  
109 v4.0.3 and a haploid ancestral sequence produced by SLiM (R Core Team, 2020).

110       Using the known genotypes for all individuals, we generated two files: (i) a record of all  
111 true heterozygous sites and (ii) the start and end coordinates for all true ROHs  $\geq 100$  kb in  
112 length. We imposed this lower limit on ROH length because ROHs less than 100 kb in length  
113 likely originated in a single common ancestor approximately 500 generations ago (assuming a  
114 recombination rate of 1 cM/1 Mb; Thompson, 2013), and would not be expected to influence  
115 contemporary individual fitness as strongly as more recently acquired autozygous segments  
116 (Stoffel et al., 2021). This threshold has also gained popularity in population genetics studies of  
117 non-model species (Robinson et al., 2019; Hasselgren et al., 2021; Sánchez-Barreiro et al., 2021;  
118 Xie et al., 2022), and we follow this convention for all downstream analyses.

119 For 100 randomly selected individuals, FASTQ read files were generated from each of  
120 the two FASTA files representing homologous chromosomes using ART (version MountRainier-  
121 2016-06-05) (Huang, Li, Myers, & Marth, 2012). We simulated 150-bp paired-end reads using  
122 the HiSeq 2500 error model to a depth of 50X per individual (*i.e.*, 25X per homologous  
123 chromosome). Each FASTQ file was quality-checked using FASTQC v0.11.9 (Andrews, 2015).  
124 We aligned reads to the ancestral sequence using the BWA-MEM algorithm implemented in  
125 BWA v0.7.17 and downsampled the resulting BAM files using SAMtools v1.11 to simulate four  
126 additional levels of coverage per individual: 5X, 10X, 15X, and 30X (Li, 2013; Li et al., 2009).

127 For each sorted BAM file, we called genotypes using the ‘HaplotypeCaller’ algorithm in  
128 Genomic Variant Call Format (GVCF) mode as implemented in GATK v4.1.9.0 (McKenna et  
129 al., 2010). For each level of coverage, individual GVCF files were combined using  
130 ‘CombineGVCFs’ and genotyped using ‘GenotypeGVCFs’. We applied ‘VariantFiltration’ to  
131 these VCF files in GATK to flag SNPs with low variant confidence ( $\text{QualByDepth} < 2$ ),  
132 exhibiting strand bias ( $\text{FisherStrand} > 40$ ), or with low mapping quality ( $\text{RMSMappingQuality} <$   
133  $20$ ). Finally, SNPs failing these filters and indels were removed using ‘SelectVariants.’

#### 134 ROH calling: hidden Markov model approach (BCFtools)

135 We applied the same ROH calling approaches to all multisample VCF files produced from the  
136 simulated data set using two of the programs most commonly applied to non-model species.  
137 First, we tested an extension of the BCFtools software package, BCFtools/RoH v1.11  
138 (Narasimhan et al., 2016). This program uses a hidden Markov model to detect regions of  
139 autozygosity, requiring only a VCF file for all samples, population allele frequency information,  
140 and an optional recombination map. Because additional genetic information is not likely to be

141 available for many wild populations, we relied on allele frequencies calculated from each of our  
142 sample sets. The main decision faced when running BCFtools/RoH is whether to estimate  
143 autozygous regions using called genotypes or genotype likelihood values. We tested the effects  
144 of this decision on ROH estimation by either including the --GTs-only setting to limit inference  
145 based on genotypes (hereafter, BCFtools Genotypes) or omitting it and allowing genotype  
146 likelihood values to be considered (hereafter, BCFtools Likelihoods) (Table 1).

#### 147 ROH calling: sliding window approach (PLINK)

148 We tested a large number of parameter value combinations in PLINK v1.90b6.26 (Chang et al.,  
149 2015; Purcell et al., 2007). Unlike BCFtools/RoH, PLINK employs a sliding window approach  
150 to ROH identification: for each window placement, SNPs are examined for conformity to the  
151 PLINK parameter values (*e.g.*, fewer than the number of heterozygous or missing calls allowed).  
152 It is then determined, for each SNP, whether a sufficient proportion of windows overlapping that  
153 SNP are homozygous and thus, whether the SNP is determined to be located within in a ROH.  
154 PLINK has multiple parameters that can be set by the user, and we initially tested a total of 486  
155 combinations of six of these parameters for each level of coverage (see Table 1 for list of  
156 parameters, initial values, and parameter descriptions). We focus on how changing software  
157 parameters affect ROH inference rather than the effects of various SNP-filtering strategies, as  
158 these questions have been addressed elsewhere (Howrigan, Simonson, & Keller, 2011;  
159 Meyermans et al., 2020).

160 Before comparing the results from the two BCFtools/RoH approaches and PLINK, we had to  
161 select one set of PLINK parameter values. We applied an iterative approach designed by Mathur  
162 et al. (2021; non-peer-reviewed preprint) to identify a combination of parameter values that



163 minimizes the effect of value selection on inferred  $F_{ROH}$  (*i.e.*, the bias in  $F_{ROH}$  inference due to  
164 each parameter value). For each iteration and level of coverage, we performed four steps:

- 165 1. Run PLINK with all possible combinations of different parameters to be tested,  
166 ultimately generating a matrix of parameter values (predictor variables) and inferred  $F_{ROH}$   
167 (response variable) for each sample.
- 168 2. Create a linear model for each combination of parameter values ( $F_{ROH} = a + b_1x_1 +$   
169  $\dots + b_nx_n + e$ ; where  $b_i$  = weight of parameter  $x_i$ ), where the values of parameter  $x_i$  are  
170 standardized to 1.
- 171 3. Extract standardized rank regression coefficients (SRC) from the linear regression models  
172 using the *sensitivity* package in R and visualize sensitivity indices ( $SRC_i$ ) to rank weights  
173 of each parameter (Iooss, Da Veiga, Janon, & Pujol, 2021).
- 174 4. If  $SRC_i \approx 0$  with little individual variation, then set the parameter  $i$  to the default value. If  
175  $SRC_i$  is  $> 0$  or  $< 0$ , then consider the effect described by  $SRC_i$  (*i.e.*, whether increasing  
176 the value of the parameter increases or decreases  $F_{ROH}$  and how  $SRC_i$  varies with called  
177  $F_{ROH}$ ) and either select a new set of parameter values to test or select a value from the  
178 tested set.

179 We began the first iteration by reading the results from the initial 486 combinations of  
180 parameter values into R v4.0.3 (R Core Team, 2020). Details of the parameter value selection  
181 process for the simulated data are provided in Box 1. Briefly, we applied the four steps outlined  
182 above by examining the results from Iteration 1 (486 parameter value combinations) and noting  
183 that increasing the value of one parameter (*phwh*) had a positive effect on inferred  $F_{ROH}$  whereas  
184 increasing the values of two other parameters (*phws* and *phzs*) had negative effects on inferred  
185  $F_{ROH}$ . For *phwh*, we allowed one heterozygous site per window to avoid (i) discarding a true

186 homozygous window due to an erroneous heterozygous call and (ii) retaining too many spurious  
187 homozygous windows due to inclusion of true heterozygous calls. For *phws* (scanning window  
188 length in SNPs) and *phzs* (minimum number of SNPs that can comprise a ROH), we tested two  
189 additional sets of parameter values and used these outputs to select the values for *phws* and *phzs*  
190 that (Table S2 and Box 1).

### 191 Data summarization and statistical analyses

192 Output files from BCFtools/RoH and the final PLINK runs were read into R for summarization  
193 and statistical analyses. We also read in true ROH data (*i.e.*, start and end coordinates for known  
194 ROHs  $\geq 100$  kb in length) and calculated true  $F_{\text{ROH}}$  values for each individual. We filtered all  
195 called ROHs to retain ROHs  $\geq 100$  kb in length and calculated inferred  $F_{\text{ROH}}$  for each individual,  
196 coverage level, and method. To describe relationships between true  $F_{\text{ROH}}$  and called  $F_{\text{ROH}}$  values,  
197 we constructed a linear model for each method and coverage level with true  $F_{\text{ROH}}$  as the  
198 predictor variable and called  $F_{\text{ROH}}$  as the response variable. For each model, we calculated the  
199 95% confidence intervals (CIs) for the slope and *y*-intercept parameters using the *confint*  
200 function in R. To determine whether true and called  $F_{\text{ROH}}$  values differed for each model, we  
201 tested whether the model's *y*-intercept differed from zero and whether the slope differed from  
202 one (*i.e.*, whether the 95% CIs included zero or one, respectively). We also used the *y*-intercept  
203 and slope parameters to determine whether each method over- or underestimated true  $F_{\text{ROH}}$  at  
204 each coverage level, and how the degree of over- or underestimation changed with increasing  
205 true  $F_{\text{ROH}}$  values.

206         At each coverage level, we compared the mean  $F_{\text{ROH}}$  values among ROH identification  
207 methods to determine whether different methods produce significantly different results. We also

208 compared mean  $F_{\text{ROH}}$  across coverage levels within each method to test whether coverage  
209 significantly affects inferred  $F_{\text{ROH}}$ . For each method and coverage level combination, we  
210 randomly sampled 15 individuals (to mirror the sample size for the empirical data, see below)  
211 from the 100 individuals with simulated genotypes, calculated mean  $F_{\text{ROH}}$ , and repeated this  
212 process 1,000 times. We generated 95% CIs around this mean using the 95% quantile of these  
213 1,000 values. We interpreted non-overlapping 95% CIs as indicative of significant differences  
214 within and among ROH identification method and coverage levels.

215 To further evaluate the accuracy of each ROH identification method, we also calculated  
216 false negative (*i.e.*, failing to call a ROH present in an individual) and false positive (*i.e.*, calling  
217 a ROH that was not present in an individual) rates for called ROHs. We began by identifying  
218 overlap between true and called ROHs on a per-position basis by summing the number of bases  
219 covered by both the true ROH and called ROH(s). From this information, we calculated (i) the  
220 false negative rate: the total chromosomal length covered by true ROHs but not by called ROHs  
221 divided by the total length of true ROHs; and (ii) the false positive rate: the total chromosomal  
222 length covered by called ROHs but not by true ROHs divided by the total chromosomal length  
223 not covered by true ROHs. For each method and level of coverage, we calculated median false  
224 positive and negative rates and compared these medians and the 50% quantiles between all  
225 method and coverage level combinations to provide insight into method-specific differences in  
226 ROH calling errors.

227 We calculated  $F_{\text{ROH}}$  for ROHs in four different length bins to explore how ROH  
228 identification methods may differ in their capabilities to accurately call ROHs of different sizes.  
229 We defined length bins as: (i)  $100 \text{ kb} \leq \text{short ROHs} < 250 \text{ kb}$ ; (ii)  $250 \text{ kb} \leq \text{intermediate ROHs} <$   
230  $500 \text{ kb}$ ; (iii)  $500 \text{ kb} \leq \text{long ROHs} < 1 \text{ Mb}$ ; (iv)  $1 \text{ Mb} \leq \text{very long ROHs}$ . We examined how  $F_{\text{ROH}}$

231 for each bin changed with increasing coverage and also how patterns of over- and  
232 underestimation of  $F_{\text{ROH}}$  varied with increasing coverage by subtracting true  $F_{\text{ROH}}$  from called  
233  $F_{\text{ROH}}$  for each individual. For each method, level of coverage, and length bin, we compared mean  
234 called  $F_{\text{ROH}}$  – true  $F_{\text{ROH}}$  and the 95% CI around these means (again estimated using the quantiles  
235 function in R), with CIs  $< 0$  indicating underestimation of true  $F_{\text{ROH}}$  and CIs  $> 0$  indicating  
236 overestimation. We further explored relationships between true and called ROHs by examining  
237 how true and called ROHs overlap. We tabulated how many true ROHs each called ROH  
238 overlaps (or contains) and vice-versa for each unique combination of ROH detection method,  
239 coverage level, and ROH length bin.

## 240 *Part II: Empirical data*

### 241 Data curation and genotype calling

242 To test the effects of program and parameter value selection on identifying ROHs from empirical  
243 data, we analyzed publicly available whole genome sequencing data for a species of conservation  
244 concern, the Tasmanian devil (*Sarcophilus harrissii*; BioProject PRJNA549794 in NCBI's  
245 Sequence Read Archive; Wright et al., 2020). From the full dataset, we selected the 15  
246 individuals from this data set with the highest number of reads. The accession numbers and  
247 relevant metadata for each set of sequences are provided in Table S1. Adapters and low-quality  
248 bases were trimmed from raw sequences using Trim Galore v0.6.6 (Krueger, 2019), and cleaned  
249 reads were mapped to the mSarHar1.11 *S. harrissii* reference genome (NCBI GenBank accession  
250 GCA\_902635505.1) using BWA-MEM (Li, 2013).

251 We used Qualimap v2.2.1 to determine mean coverage per individual from each sorted  
252 BAM file (Okonechnikov, Conesa, & García-Alcalde, 2016). These results were used to

253 calculate the downsampling proportions required to approximate 5X, 10X, 15X, and 30X  
254 coverage for each individual. Following downsampling, BAM files were processed in the same  
255 manner as for the simulated data, with additional SNP filtering criteria applied in VCFtools  
256 v0.1.17 (Danecek et al., 2011), including filtering SNPs within 5 bp of indels and requiring  
257 minor allele frequencies  $\geq 0.05$  and  $< 20\%$  missing data across individuals.

#### 258 ROH calling and sensitivity analyses

259 We called ROHs from the final multisample VCF files using the same approaches as for the  
260 simulated data. We called ROHs in two ways, (i) using BCFtools/RoH (*i.e.*, relying on genotypes  
261 or on genotype likelihood values) and (ii) testing 486 parameter combinations in PLINK at each  
262 level of coverage and identifying robust values for each parameter following the same sensitivity  
263 analysis process described above. Parameter values for all iterations tested are provided in Table  
264 S2 with additional details provided for the empirical data in the Supplementary Material.

#### 265 Data summarization and statistical analysis

266 Output files from BCFtools/RoH and the final PLINK runs for the empirical data were read into  
267 R for summarization and statistical analyses. Following the approach we used for the simulated  
268 data, we filtered all called ROHs to retain ROHs  $\geq 100$  kb in length and calculated inferred  $F_{\text{ROH}}$   
269 for each individual, coverage level, and method. We also calculated  $F_{\text{ROH}}$  for ROHs in four  
270 different length bins, where length bins were defined as: (i)  $100 \text{ kb} \leq \text{short ROHs} < 500 \text{ kb}$ ; (ii)  
271  $500 \text{ kb} \leq \text{intermediate ROHs} < 1 \text{ Mb}$ ; (iii)  $1 \text{ Mb} \leq \text{long ROHs} < 2 \text{ Mb}$ ; (iv)  $2 \text{ Mb} \leq \text{very long}$   
272 ROHs. To compare results across methods, coverage levels, and ROH lengths, we calculated  
273 mean  $F_{\text{ROH}}$  values and compared the 95% CIs around these means among methods and coverage  
274 levels.

## 275 **Results**

### 276 *Part I: Simulated data*

#### 277 Data collection and curation

278 For the simulated data set, all analyses were based on 100 individuals randomly sampled from  
279 the small simulated population ( $N = 250$ ) that underwent a strong bottleneck 5,000 generations  
280 ago. Mean heterozygosity for these 100 individuals was  $7.68 \times 10^{-5}$  ( $SD = 5.88 \times 10^{-6}$ ). After  
281 retaining only ROHs  $\geq 100$  kb in length, mean  $F_{ROH}$  was 0.151 ( $SD = 0.045$ ) and ranged from  
282 0.083 to 0.293. Following downsampling and SNP filtering, the final mean coverage was 4.80,  
283 9.70, 14.62, and 28.91 for the 5X, 10X, 15X, and 30X downsampled sets, respectively.

#### 284 ROH calling results

285 We used our simulated data set and linear models to determine whether each approach tends to  
286 over- or underestimate true  $F_{ROH}$ . Both of the BCFtools methods (Genotypes and Likelihoods)  
287 underestimated  $F_{ROH}$ , with all model intercepts across coverage levels negative and different  
288 from zero (*i.e.*, no 95% CIs for intercepts included zero; Fig. 1; Table S3). For BCFtools  
289 Genotypes, model slopes were approximately one (*i.e.*, all 95% CIs for slopes included one;  
290 Table S3), whereas the slopes of all BCFtools Likelihoods models were significantly less than  
291 one, indicating that  $F_{ROH}$  estimated using Likelihoods can vary relative to true  $F_{ROH}$ . PLINK  
292 tended to produce overestimates of  $F_{ROH}$ , but estimates at the highest coverage levels were  
293 accurate (*i.e.*, the 95% CI for model intercepts included zero at 30X and 50X). The 95% CI for  
294 the PLINK 5X model was larger and did not overlap the 95% CIs for the other PLINK coverage  
295 level model intercepts, indicating greater overestimation occurred using 5X PLINK compared to  
296 using PLINK at other coverages. PLINK model slopes did not differ from one at 5X or 10X, but

297 did differ at 15X, 30X, and 50X, with these slope estimates exceeding one, again indicating that  
298 the estimated  $F_{\text{ROH}}$  varied with true  $F_{\text{ROH}}$ .

299 We also compared  $F_{\text{ROH}}$  values across methods and observed the largest differences for  
300  $F_{\text{ROH}}$  calculated from 5X coverage data (Fig. 2A-C). We compared the 95% CIs around mean  
301  $F_{\text{ROH}}$  and found that at 5X, BCFtools Likelihoods produced significantly smaller  $F_{\text{ROH}}$  estimates  
302 than BCFtools Genotypes, and both BCFtools estimates were smaller than PLINK's estimate. At  
303 all other coverage levels, mean  $F_{\text{ROH}}$  did not differ between the two BCFtools methods and  
304 PLINK again produced significantly higher  $F_{\text{ROH}}$  estimates. For both BCFtools approaches, there  
305 were no significant differences in mean  $F_{\text{ROH}}$  across coverage levels, but for PLINK,  $F_{\text{ROH}}$   
306 estimated at 5X was significantly greater than estimates at higher coverage levels. For all  
307 methods and at all coverage levels, inferred mean  $F_{\text{ROH}}$  differed from the true mean  $F_{\text{ROH}}$  value  
308 (*i.e.*, none of the bootstrapped 95% CIs included the true mean  $F_{\text{ROH}}$  value). Raw results for all  
309 individuals are presented in Fig. S1.

310 We calculated false negative (*i.e.*, failing to call a ROH present in an individual) and false  
311 positive (*i.e.*, calling a ROH that was not present in an individual) rates to further assess each  
312 method's accuracy. With respect to false positive rates, PLINK performed poorly relative to the  
313 other methods, with median false positive rates of 0.078 for PLINK, 0.018 for BCFtools  
314 Genotypes, and  $4.09 \times 10^{-8}$  for BCFtools Likelihoods across all tested coverage levels (Fig. 3A).  
315 For all three methods, increasing coverage to 10X corresponded to decreasing false positive  
316 rates, but these tended to level off at high coverages. Variation in false positive rates among  
317 samples at each coverage level was smallest for BCFtools Likelihoods, followed by BCFtools  
318 Genotypes, with PLINK showing the greatest variation across samples (summary statistics  
319 provided in Table S4). Generally speaking, the patterns in false negative rates were in the

320 opposite direction and magnitude to those we observed with false positives: both BCFtools  
321 methods performed poorly relative to PLINK, with BCFtools Genotypes producing slightly  
322 lower rates (overall median = 0.552) than BCFtools Likelihoods (overall median = 0.744; Fig.  
323 3B). PLINK exhibited lower false negative rates than the BCFtools approaches (overall median =  
324 0.165) and less variation among samples at each coverage level. All three methods produced  
325 false negative rates that increased with increasing coverage up to 10X. Examples of false  
326 negative and false positive scenarios can be seen in Fig. 4, which illustrates a 6-Mb window of  
327 true and called ROHs for one exemplar individual (full chromosome-level examples can be seen  
328 for three individuals in Fig. S2).

329 We also examined how true and called values of  $F_{\text{ROH}}$  varied for ROHs of different  
330 lengths. For the simulated data, all three methods almost always underestimated the proportion  
331 of the genome located in short ROHs, with the 95% CI less than zero for all tests other than  
332 PLINK at 5X coverage (Fig. 5A-C). For ROHs of intermediate, long, and very long lengths, all  
333 of the 95% CIs included zero. PLINK produced the highest overestimates of  $F_{\text{ROH}}$  and the most  
334 variation across samples of the three approaches, followed by BCFtools Genotypes. However,  
335 95% CIs for BCFtools Likelihoods included zero for these three length bins, and variation  
336 among individuals decreased with both increasing coverage and increasing ROH length,  
337 suggesting increased accuracy with increasing depth and ROH length (Fig. 5B). PLINK and  
338 BCFtools Genotypes almost exclusively overestimated  $F_{\text{ROH}}$  for very long ROHs, even though  
339 most (94/100) of the simulated individuals had no very long true ROHs (Fig. 5D). Finally, one  
340 coverage-related trend emerged across ROH length categories and methods, with  $F_{\text{ROH}}$  estimates  
341 calculated at 5X coverage often exceeding estimates calculated at higher coverage levels. Across  
342 all length bins combined, individual estimates of  $F_{\text{ROH}}$  calculated at 5X were greater than those



343 calculated at 10X for 34%, 56%, and 72% of BCFtools Likelihoods, BCFtools Genotypes, and  
344 PLINK estimates, respectively.

345 To further investigate how called ROHs correspond to true ROHs, we identified regions  
346 of overlap between true and called ROHs within each individual and at each coverage level using  
347 a unique identifier for each true and called ROH. We found no instances of true ROHs being  
348 split into multiple called ROHs, but multiple true ROHs were often lumped together into a single  
349 called ROH. This pattern held true for all three methods and at most coverage levels (Fig. 6). For  
350 BCFtools Genotypes and PLINK, increasing coverage did not appear to ameliorate this problem  
351 (*i.e.*, the mean number of true ROHs lumped into a single called ROH changed very little with  
352 increasing coverage). However, for BCFtools Likelihoods, the number of true ROHs contained  
353 in a single called ROH decreased with increasing coverage, reaching a 1:1 ratio at 30X. Across  
354 all three methods, the mean number of true ROHs combined into a single called ROH increased  
355 with increasing ROH length with the exception of BCFtools Likelihoods at coverage levels  $\geq$   
356 30X (Fig. S4). Examples of this lumping tendency can be seen in Fig. 4 and Fig. S2.

## 357 *Part II: Empirical data*

### 358 Genotype and ROH calling results

359 For the 15 sets of reads we downloaded from NCBI, the mean number of reads per sample was  
360  $9.75 \times 10^8$ . Read mapping rates to the mSarHar1.11 *S. harrissii* reference genome were high,  
361 with an average of 95.4% of reads mapped and properly paired. For the final sets of filtered  
362 SNPs ( $n = 1,532,598$ ), average depth across samples was 48.43 for the full coverage set (*i.e.*, not  
363 downsampled) and 6.37, 11.84, 16.63, 30.75 for the 5X, 10X, 15X, and 30X downsampled sets,  
364 respectively (Table S1).

365 Across methods,  $F_{ROH}$  estimated at 5X coverage was significantly higher than  $F_{ROH}$   
366 estimates at all higher levels of coverage (95% CIs did not overlap, Fig. 2 D-F). At 5X coverage,  
367  $F_{ROH}$  estimates produced by the two BCFtools approaches significantly differed from one  
368 another, with neither approach's estimates differing from PLINK's. For all higher levels of  
369 coverage,  $F_{ROH}$  estimates produced by BCFtools Genotypes and PLINK did not differ but  
370 estimates from both methods differed from those produced by BCFtools Likelihoods.

371 When comparing how the three methods estimated length-specific  $F_{ROH}$  values, patterns  
372 varied across ROH length categories. For short ROHs, PLINK produced the highest  $F_{ROH}$   
373 estimates, followed by BCFtools Likelihoods and then by BCFtools Genotypes, with differences  
374 among the three methods significant (*i.e.*, non-overlapping 95% CIs) at 5X-30X coverage and  
375 differences between BCFtools Genotypes and the other two methods significant at 50X (Fig. 7).  
376 For longer ROHs, BCFtools Genotypes generally had higher  $F_{ROH}$  estimates than the other two  
377 approaches, and these differences were significant at all coverage levels for long and very long  
378 ROHs. Across all methods and ROH length bins,  $F_{ROH}$  estimated at 5X coverage were all  
379 significantly different from estimates at all other coverage levels within each method and ROH  
380 length bin combination.

## 381 Discussion

382 In this manuscript, we highlight the quantitative differences in ROH detection between multiple  
383 programs and effects on downstream interpretations associated with these differences. However,  
384 these are dependent on our ability to choose appropriate program parameter values, which is  
385 particularly complicated when there are a large number of possible parameter value

386 combinations. Although some studies describe testing multiple sets of PLINK parameter values  
387 (*e.g.*, Saremi et al., 2019; Grossen et al., 2020; von Seth et al., 2021; Mueller et al., 2022), many  
388 do not and there is no widely used, previously published approach to systematically compare  
389 results produced by different parameter value combinations.

390         In Box 1, we demonstrate the exploratory utility of the sensitivity analysis process we  
391 followed to select parameter values for our data (see the Supplementary Material for  
392 corresponding information for the empirical data). This process is important because disparate  
393 sequencing data characteristics are likely to require different parameter values, meaning that it  
394 may not be appropriate to use the values we used herein when analyzing other data. For example,  
395 studies that use fewer SNPs (*e.g.*, populations that are less genetically diverse, studies with  
396 reduced sequencing efforts) should test the effects of altering the minimum SNP density required  
397 on ROH inference results. Interactions between specific parameters should also be visualized,  
398 such as between the number of heterozygous calls allowed in a window and window size in  
399 SNPs, particularly if a reference genome is not assembled to chromosome-level or if mapping  
400 rates are somewhat heterogenous across the genome. Sensitivity analysis provides a quick and  
401 convenient way to visualize how different parameter values affect  $F_{\text{ROH}}$  estimates for an entire  
402 data set and the degree of variation in those effects across individuals. For samples where  
403 inbreeding is anticipated to be highly variable across individuals or for data sets where coverage  
404 varies between 5X and 10X, evaluating inter-individual variation in  $F_{\text{ROH}}$  inference results is  
405 particularly important, especially in light of the length-specific ROH inference issues we  
406 describe for our results.

407 *Inferred  $F_{ROH}$  value accuracy varies with method and level of coverage*

408 The patterns of  $F_{ROH}$  we estimated tended to vary with program choice and an individual's  
409 inbreeding history, potentially leading to uncertainty when incorporating these inbreeding values  
410 into management action plans. Between the two BCFtools methods when considering identified  
411 ROHs of all lengths, Genotypes produced more accurate overall  $F_{ROH}$  estimates than  
412 Likelihoods, with  $F_{ROH}$  estimates from Likelihoods also increasingly diverging from the true  
413  $F_{ROH}$  value with increasing true  $F_{ROH}$  (Fig. 1A,B). For populations expected to have considerable  
414 variation in  $F_{ROH}$  among individuals (*e.g.*, a population that has remained somewhat small for an  
415 extended period of time with evidence of recent immigration), applying the BCFtools  
416 Likelihoods approach could result in increasingly skewed values for the individuals with the  
417 highest levels of inbreeding. For example, using the linear model parameters estimated for 15X  
418 coverage, an individual with a true  $F_{ROH}$  of 0.10 would be assigned an inferred  $F_{ROH}$  of 0.01  
419 (difference = -0.09), whereas an individual with a true  $F_{ROH}$  value of 0.40 would be assigned  
420 0.23 (difference = -0.17). This could be particularly problematic when dealing with species or  
421 populations of conservation concern because the individuals with the highest true  $F_{ROH}$  also have  
422 the largest magnitude of error, meaning that concerning signals of inbreeding could go  
423 undetected.

424 In contrast to the underestimations produced by the BCFtools/RoH methods, the sliding  
425 window approach implemented in PLINK overestimated  $F_{ROH}$ . This was particularly evident at  
426 5X coverage where  $F_{ROH}$  estimates differ more from their true values than any other method and  
427 coverage level combination in our study (Fig. 1C). However, at coverages above 5X, PLINK  
428 produced better estimates than either BCFtools approach (*i.e.*, in our linear models, intercepts for  
429 PLINK at 10X-50X are closer to zero than for either BCFtools method and 95% CIs for these

430 parameter estimates do not overlap with any BCFtools intercept 95% CIs). In the context of  
431 endangered species conservation, small overestimations of  $F_{ROH}$  may be more desirable than  
432 underestimations because these are likely to be more conservative (*i.e.*, indicating more close  
433 inbreeding than is present in reality) in many situations. Importantly though, as with BCFtools  
434 Likelihoods,  $F_{ROH}$  estimates diverged from true  $F_{ROH}$  at increasing values of true  $F_{ROH}$ . However,  
435 these values diverged at a much lower rate in the PLINK estimates compared to BCFtools  
436 Likelihoods. Again using our simulated data as a model, an individual with a true  $F_{ROH}$  value of  
437 0.40 would be estimated to have an  $F_{ROH}$  of 0.46 (difference = 0.06) when estimated at 10X-50X  
438 with PLINK.

439         For the two BCFtools methods, patterns of underestimation were consistent with these  
440 approaches' high false negative rates and low false positive rates (Fig. 3). Conversely, PLINK  
441 produced higher false positive rates and lower false negative rates than either BCFtools method,  
442 consistent with overestimation of  $F_{ROH}$ . In terms of absolute difference between true and called  
443  $F_{ROH}$  values, PLINK outperformed BCFtools at 10X coverage and above, suggesting that PLINK  
444 will often provide the most robust estimate of  $F_{ROH}$ . However, at lower coverages (5X-10X),  
445 BCFtools Genotypes could be considered, given that this method produces  $F_{ROH}$  estimates closer  
446 to true  $F_{ROH}$  than either PLINK or BCFtools Likelihoods. On the other hand, the underestimates  
447 produced by this approach are likely related to the high false negative rates we observed  
448 (especially relative to PLINK), and the appearance of convergence on true  $F_{ROH}$  may be due to  
449 length-specific ROH calling rates by this program (see below) and therefore highly variable  
450 across populations. It is important to note that while the trends we describe may be consistent  
451 with some empirical results (*e.g.*, Robinson et al., 2019), individual variation in genomic

452 characteristics exerts strong influence over  $F_{\text{ROH}}$  inference results as suggested by comparisons  
453 between our simulated and empirical results.

454 *Coverage  $\leq 10X$  strongly influences called ROH lengths*

455 For the empirical data at 5X coverage, relative to higher coverage levels, all methods  
456 consistently produced lower  $F_{\text{ROH}}$  estimates for short ROHs and higher  $F_{\text{ROH}}$  estimates for longer  
457 ROHs (Fig. 7). The overcalling of intermediate to very long ROHs at 5X could be related to the  
458 ROH-lumping issue noted in the simulated results, wherein multiple true ROHs are erroneously  
459 called as a single ROH (Fig. 6). While we cannot confirm the accuracy of  $F_{\text{ROH}}$  inference for the  
460 empirical data, comparisons between results generated at 5X and higher levels of coverage are  
461 consistent with the simulated results, suggesting that these patterns are accurate (Fig. 2). For the  
462 Tasmanian devil samples we analyzed, the results from 5X coverage suggest much more  
463 frequent, recent inbreeding than the results from  $\geq 10X$  coverage, painting a much more dire  
464 demographic scenario than is presented when more coverage is obtained. If one of the goals of a  
465 whole-genome sequencing project is to assess recent or historical patterns of inbreeding from  
466 ROH lengths,  $\sim 10X$  coverage appears to be a minimum requirement for generating robust  
467 inferences.

468 *Patterns of under- or overestimation may vary with ROH length distributions*

469 In our simulated and empirical data, we observed patterns indicating that underlying ROH length  
470 distributions influence the patterns of  $F_{\text{ROH}}$  under- and overestimation. For example, even though  
471 PLINK produced higher  $F_{\text{ROH}}$  estimates than both BCFtools methods for the simulated data and  
472 PLINK and BCFtools Genotypes produced statistically indistinguishable estimates for the  
473 empirical data (Fig. 2), length-specific  $F_{\text{ROH}}$  estimates suggest that differences in underlying true

474 ROH length distributions between the simulated and empirical data may be responsible for the  
475 differences in relative  $F_{\text{ROH}}$  results we observed. For the simulated data, BCFtools Genotypes  
476 increasingly overestimated  $F_{\text{ROH}}$  as ROH length increased (Fig. 5, Fig. S2), with increasing  
477 numbers of true ROHs erroneously combined into single called ROHs (Fig. 6). Although we  
478 cannot know the true ROH length distributions for the empirical data, long ROHs were called at  
479 higher frequencies in the empirical data (at 15X: 382, 397, and 1,281 total ROHs  $\geq$  1 Mb in  
480 length called by PLINK, BCFtools Likelihoods, and BCFtools Genotypes, respectively, in 15  
481 individuals) relative to the simulated data (31 total true ROHs  $\geq$  1 Mb in length in 25  
482 individuals). The tendency of BCFtools Genotypes to overestimate  $F_{\text{ROH}}$  for long ROHs  
483 combined with the presence of more called long ROHs in our empirical data set may have  
484 minimized differences in overall  $F_{\text{ROH}}$  estimates between BCFtools Genotypes and PLINK in the  
485 empirical results relative to the simulated results (Fig. 2). Increased frequencies of long ROHs in  
486 the empirical data may have also led to greater differences in  $F_{\text{ROH}}$  between 5X and 10X across  
487 all three methods for the empirical results compared to the simulated results (Fig. 2). All three  
488 methods call significantly more intermediate to very long ROHs from the empirical data at 5X  
489 than at 10X (Fig. 7B-D), and this may be related to the increased false positive rates we noted at  
490 5X in the simulated data. These results again illustrate the effects of a population's or  
491 individual's actual ROH complement, which is determined by typically unknown demographic  
492 and breeding patterns, on the relative reliability and utility of ROH identification programs.

493         Particularly for endangered species with potentially complicated demographic histories,  
494 interpreting ROH patterns in a population may be most accurate when multiple tools are used to  
495 create an integrated picture. For example, comparing overall and length-specific  $F_{\text{ROH}}$  estimates  
496 between BCFTools/RoH and PLINK can be used to understand the underlying length

497 distributions; an abundance of shorter ROHs would be indicated by higher overall  $F_{\text{ROH}}$   
498 estimates in PLINK compared to BCFtools Genotypes but similar length-specific  $F_{\text{ROH}}$  patterns,  
499 whereas a ROH complement comprising many longer ROHs would be indicated by similar  
500 overall  $F_{\text{ROH}}$  estimates between PLINK and BCFtools Genotypes but higher intermediate to very  
501 long  $F_{\text{ROH}}$  estimates from BCFtools Genotypes related to PLINK. These accurate assessments of  
502 past and ongoing inbreeding could then be used to inform management options, such as  
503 translocations to ameliorate close inbreeding.

#### 504 *Conclusions*

505 Inferring the presence and characteristics of ROHs can shed important light on population  
506 demographic histories, detect inbreeding depression when combined with fitness information,  
507 and even disentangle the mechanisms underlying or loci contributing to inbreeding depression.  
508 However, given the variation in ROH-calling accuracy (overall and length-specific)  
509 demonstrated here, we caution against direct comparisons of  $F_{\text{ROH}}$  values generated from  
510 different data types or sources or using different inference parameters. Data from disparate  
511 studies could be combined and re-analyzed in a standardized fashion, although special attention  
512 should be paid to variation in reference genome assembly quality for interspecific comparisons  
513 (Brüniche-Olsen, Kellner, Anderson, & DeWoody, 2018). Regardless of the number of data sets  
514 to be analyzed, we strongly recommend that studies relying on ROH inference (i) employ at least  
515 two ROH-calling programs and interpret their results with each method's biases in mind and/or  
516 (ii) compare multiple parameter value combinations via sensitivity analysis, taking care to vary  
517 parameters of particular relevance to a data set.



518 **Acknowledgments**

519 This material is based on work supported by the National Science Foundation Postdoctoral  
520 Research Fellowships in Biology Program under Grant No. 2010251 to AMH. This work was  
521 also supported by the U.S. Department of Agriculture, National Institute of Food and  
522 Agriculture, Hatch project 1025651 to JRW.

## 523 References

- 524 Andrews, S. (2015). *FastQC: A quality control tool for high throughput sequence data*.  
525 Retrieved from <http://www.bioinformatics.babraham.ac.uk/projects/fastqc/>
- 526 Brüniche-Olsen, A., Kellner, K. F., Anderson, C. J., & DeWoody, J. A. (2018). Runs of  
527 homozygosity have utility in mammalian conservation and evolutionary studies.  
528 *Conservation Genetics*, 19(6), 1295–1307. doi: 10.1007/s10592-018-1099-y
- 529 Ceballos, F. C., Hazelhurst, S., & Ramsay, M. (2018). Assessing runs of homozygosity: A  
530 comparison of SNP array and whole genome sequence low coverage data. *BMC*  
531 *Genomics*, 19(1), 106. doi: 10.1186/s12864-018-4489-0
- 532 Ceballos, F. C., Joshi, P. K., Clark, D. W., Ramsay, M., & Wilson, J. F. (2018). Runs of  
533 homozygosity: Windows into population history and trait architecture. *Nature Reviews*  
534 *Genetics*, 19(4), 220–234. doi: 10.1038/nrg.2017.109
- 535 Chang, C. C., Chow, C. C., Tellier, L. C., Vattikuti, S., Purcell, S. M., & Lee, J. J. (2015).  
536 Second-generation PLINK: Rising to the challenge of larger and richer datasets.  
537 *GigaScience*, 4(1), 7. doi: 10.1186/s13742-015-0047-8
- 538 Crnokrak, P., & Roff, D. A. (1999). Inbreeding depression in the wild. *Heredity*, 83(3), 260–270.  
539 doi: 10.1038/sj.hdy.6885530
- 540 Danecek, P., Auton, A., Abecasis, G., Albers, C. A., Banks, E., DePristo, M. A., ... 1000  
541 Genomes Project Analysis Group. (2011). The variant call format and VCFtools.  
542 *Bioinformatics*, 27(15), 2156–2158. doi: 10.1093/bioinformatics/btr330
- 543 Diffenbaugh, N. S., & Field, C. B. (2013). Changes in ecologically critical terrestrial climate  
544 conditions. *Science*, 341(6145), 486–492. doi: 10.1126/science.1237123
- 545 Duntsch, L., Whibley, A., Brekke, P., Ewen, J. G., & Santure, A. W. (2021). Genomic data of  
546 different resolutions reveal consistent inbreeding estimates but contrasting homozygosity  
547 landscapes for the threatened Aotearoa New Zealand hihi. *Molecular Ecology*,  
548 *mec.16068*. doi: 10.1111/mec.16068
- 549 Gibbs, H. L., & Grant, P. R. (1989). Inbreeding in Darwin's medium ground finches (*Geospiza*  
550 *fortis*). *Evolution*, 43, 1273–1284.
- 551 Grossen, C., Guillaume, F., Keller, L. F., & Croll, D. (2020). Purging of highly deleterious  
552 mutations through severe bottlenecks in Alpine ibex. *Nature Communications*, 11(1),  
553 1001. doi: 10.1038/s41467-020-14803-1
- 554 Haddad, N. M., Brudvig, L. A., Clobert, J., Davies, K. F., Gonzalez, A., Holt, R. D., ...  
555 Townshend, J. R. (2015). Habitat fragmentation and its lasting impact on Earth's  
556 ecosystems. *Science Advances*, 1(2), e1500052. doi: 10.1126/sciadv.1500052
- 557 Haller, B. C., & Messer, P. W. (2019a). Evolutionary modeling in SLiM 3 for beginners.  
558 *Molecular Biology and Evolution*, 36(5), 1101–1109. doi: 10.1093/molbev/msy237
- 559 Haller, B. C., & Messer, P. W. (2019b). SLiM 3: Forward genetic simulations beyond the  
560 Wright-Fisher model. *Molecular Biology and Evolution*, 36(3), 632–637. doi:  
561 10.1093/molbev/msy228
- 562 Harrison, K. A., Magrath, M. J. L., Yen, J. D. L., Pavlova, A., Murray, N., Quin, B., ...  
563 Sunnucks, P. (2019). Lifetime fitness costs of inbreeding and being inbred in a critically  
564 endangered bird. *Current Biology*, 29(16), 2711–2717.e4. doi: 10.1016/j.cub.2019.06.064
- 565 Hasselgren, M., Dussex, N., Seth, J., Angerbjörn, A., Olsen, R., Dalén, L., & Norén, K. (2021).  
566 Genomic and fitness consequences of inbreeding in an endangered carnivore. *Molecular*  
567 *Ecology*, 30(12), 2790–2799. doi: 10.1111/mec.15943

- 568 Hedrick, P. W., & Garcia-Dorado, A. (2016). Understanding inbreeding depression, purging, and  
569 genetic rescue. *Trends in Ecology & Evolution*, *31*, 940–952.
- 570 Howrigan, D. P., Simonson, M. A., & Keller, M. C. (2011). Detecting autozygosity through runs  
571 of homozygosity: A comparison of three autozygosity detection algorithms. *BMC*  
572 *Genomics*, *12*(1), 460. doi: 10.1186/1471-2164-12-460
- 573 Huang, W., Li, L., Myers, J. R., & Marth, G. T. (2012). ART: A next-generation sequencing read  
574 simulator. *Bioinformatics*, *28*(4), 593–594. doi: 10.1093/bioinformatics/btr708
- 575 Huisman, J., Kruuk, L. E. B., Ellis, P. A., Clutton-Brock, T., & Pemberton, J. M. (2016).  
576 Inbreeding depression across the lifespan in a wild mammal population. *Proceedings of*  
577 *the National Academy of Sciences*, *113*(13), 3585–3590. doi: 10.1073/pnas.1518046113
- 578 Iooss, B., Da Veiga, S., Janon, A., & Pujol, G. (2021). *sensitivity: Global Sensitivity Analysis of*  
579 *Model Outputs* [R]. Retrieved from <https://CRAN.R-project.org/package=sensitivity>
- 580 Kardos, M., Taylor, H. R., Ellegren, H., Luikart, G., & Allendorf, F. W. (2016). Genomics  
581 advances the study of inbreeding depression in the wild. *Evolutionary Applications*,  
582 *9*(10), 1205–1218. doi: 10.1111/eva.12414
- 583 Keller, L., & Waller, D. (2002). Inbreeding effects in wild populations. *Trends in Ecology &*  
584 *Evolution*, *17*(5), 230–241. doi: 10.1016/S0169-5347(02)02489-8
- 585 Krueger, F. (2019). *Trim Galore*. Cambridge, U.K.: Babraham Institute.
- 586 Li, H. (2013). Aligning sequence reads, clone sequences and assembly contigs with BWA-MEM.  
587 *ArXiv:1303.3997 [q-Bio]*. Retrieved from <http://arxiv.org/abs/1303.3997>
- 588 Li, H., Handsaker, B., Wysoker, A., Fennell, T., Ruan, J., Homer, N., ... 1000 Genome Project  
589 Data Processing Subgroup. (2009). The sequence alignment/map format and SAMtools.  
590 *Bioinformatics*, *25*(16), 2078–2079. doi: 10.1093/bioinformatics/btp352
- 591 Liberg, O., Andrén, H., Pedersen, H.-C., Sand, H., Sejberg, D., Wabakken, P., ... Bensch, S.  
592 (2005). Severe inbreeding depression in a wild wolf (*Canis lupus*) population. *Biology*  
593 *Letters*, *1*(1), 17–20. doi: 10.1098/rsbl.2004.0266
- 594 Liu, S., Westbury, M. V., Dussex, N., Mitchell, K. J., Sinding, M.-H. S., Heintzman, P. D., ...  
595 Gilbert, M. T. P. (2021). Ancient and modern genomes unravel the evolutionary history  
596 of the rhinoceros family. *Cell*, S0092867421008916. doi: 10.1016/j.cell.2021.07.032
- 597 McKenna, A., Hanna, M., Banks, E., Sivachenko, A., Cibulskis, K., Kernysky, A., ... DePristo,  
598 M. A. (2010). The Genome Analysis Toolkit: A MapReduce framework for analyzing  
599 next-generation DNA sequencing data. *Genome Research*, *20*(9), 1297–1303. doi:  
600 10.1101/gr.107524.110
- 601 Meyermans, R., Gorssen, W., Buys, N., & Janssens, S. (2020). How to study runs of  
602 homozygosity using PLINK? A guide for analyzing medium density SNP data in  
603 livestock and pet species. *BMC Genomics*, *21*(1), 94. doi: 10.1186/s12864-020-6463-x
- 604 Mueller, S. A., Prost, S., Anders, O., Breitenmoser-Würsten, C., Kleven, O., Klinga, P., ...  
605 Nowak, C. (2022). Genome-wide diversity loss in reintroduced Eurasian lynx populations  
606 urges immediate conservation management. *Biological Conservation*, *266*, 109442. doi:  
607 10.1016/j.biocon.2021.109442
- 608 Narasimhan, V., Danecek, P., Scally, A., Xue, Y., Tyler-Smith, C., & Durbin, R. (2016).  
609 BCFtools/RoH: A hidden Markov model approach for detecting autozygosity from next-  
610 generation sequencing data. *Bioinformatics*, *32*(11), 1749–1751. doi:  
611 10.1093/bioinformatics/btw044

- 612 O’Grady, J. J., Brook, B. W., Reed, D. H., Ballou, J. D., Tonkyn, D. W., & Frankham, R. (2006).  
613 Realistic levels of inbreeding depression strongly affect extinction risk in wild  
614 populations. *Biological Conservation*, *133*(1), 42–51. doi: 10.1016/j.biocon.2006.05.016
- 615 Okonechnikov, K., Conesa, A., & García-Alcalde, F. (2016). Qualimap 2: Advanced multi-  
616 sample quality control for high-throughput sequencing data. *Bioinformatics*, *32*, 292–294.
- 617 Palkopoulou, E., Mallick, S., Skoglund, P., Enk, J., Rohland, N., Li, H., ... Dalén, L. (2015).  
618 Complete genomes reveal signatures of demographic and genetic declines in the woolly  
619 mammoth. *Current Biology*, *25*(10), 1395–1400. doi: 10.1016/j.cub.2015.04.007
- 620 Purcell, S., Neale, B., Todd-Brown, K., Thomas, L., Ferreira, M. A. R., Bender, D., ... Sham, P.  
621 C. (2007). PLINK: A tool set for whole-genome association and population-based  
622 linkage analyses. *The American Journal of Human Genetics*, *81*(3), 559–575. doi:  
623 10.1086/519795
- 624 R Core Team. (2020). *R: a language and environment for statistical computing*. Vienna, Austria:  
625 R Foundation for Statistical Computing. Retrieved from <https://www.R-project.org/>
- 626 Robinson, J. A., Rääkkönen, J., Vucetich, L. M., Vucetich, J. A., Peterson, R. O., Lohmueller, K.  
627 E., & Wayne, R. K. (2019). Genomic signatures of extensive inbreeding in Isle Royale  
628 wolves, a population on the threshold of extinction. *Science Advances*, *5*(5), eaau0757.  
629 doi: 10.1126/sciadv.aau0757
- 630 Saccheri, I., Kuussaari, M., Kankare, M., Vikman, P., Fortelius, W., & Hanski, I. (1998).  
631 Inbreeding and extinction in a butterfly metapopulation. *Nature*, *392*(6675), 491–494.  
632 doi: 10.1038/33136
- 633 Sánchez-Barreiro, F., Gopalakrishnan, S., Ramos-Madrugal, J., Westbury, M. V., Manuel, M.,  
634 Margaryan, A., ... Gilbert, M. T. P. (2021). Historical population declines prompted  
635 significant genomic erosion in the northern and southern white rhinoceros  
636 (*Ceratotherium simum*). *Molecular Ecology*, *30*(23), 6355–6369. doi:  
637 10.1111/mec.16043
- 638 Saremi, N. F., Supple, M. A., Byrne, A., Cahill, J. A., Coutinho, L. L., Dalén, L., ... Shapiro, B.  
639 (2019). Puma genomes from North and South America provide insights into the genomic  
640 consequences of inbreeding. *Nature Communications*, *10*(1), 4769. doi: 10.1038/s41467-  
641 019-12741-1
- 642 Slate, J., Kruuk, L. E. B., Marshall, T. C., Pemberton, J. M., & Clutton-Brock, T. H. (2000).  
643 Inbreeding depression influences lifetime breeding success in a wild population of red  
644 deer (*Cervus elaphus*). *Proceedings of the Royal Society of London. Series B: Biological  
645 Sciences*, *267*(1453), 1657–1662. doi: 10.1098/rspb.2000.1192
- 646 Stoffel, M. A., Johnston, S. E., Pilkington, J. G., & Pemberton, J. M. (2021). Genetic architecture  
647 and lifetime dynamics of inbreeding depression in a wild mammal. *Nature  
648 Communications*, *12*(1), 2972. doi: 10.1038/s41467-021-23222-9
- 649 Stoffel, Martin A., Johnston, S. E., Pilkington, J. G., & Pemberton, J. M. (2021). Mutation load  
650 decreases with haplotype age in wild Soay sheep. *Evolution Letters*, *5*(3), 187–195. doi:  
651 10.1002/evl3.229
- 652 Szpiech, Z. A., Xu, J., Pemberton, T. J., Peng, W., Zöllner, S., Rosenberg, N. A., & Li, J. Z.  
653 (2013). Long runs of homozygosity are enriched for deleterious variation. *The American  
654 Journal of Human Genetics*, *93*(1), 90–102. doi: 10.1016/j.ajhg.2013.05.003
- 655 Thompson, E. A. (2013). Identity by descent: Variation in meiosis, across genomes, and in  
656 populations. *Genetics*, *194*(2), 301–326. doi: 10.1534/genetics.112.148825

- 657 von Seth, J., Dussex, N., Díez-del-Molino, D., van der Valk, T., Kutschera, V. E., Kierczak, M.,  
658 ... Dalén, L. (2021). Genomic insights into the conservation status of the world's last  
659 remaining Sumatran rhinoceros populations. *Nature Communications*, 12(1), 2393. doi:  
660 10.1038/s41467-021-22386-8
- 661 Wright, B. R., Farquharson, K. A., McLennan, E. A., Belov, K., Hogg, C. J., & Grueber, C. E.  
662 (2020). A demonstration of conservation genomics for threatened species management.  
663 *Molecular Ecology Resources*, 20(6), 1526–1541. doi: 10.1111/1755-0998.13211
- 664 Xie, H.-X., Liang, X.-X., Chen, Z.-Q., Li, W.-M., Mi, C.-R., Li, M., ... Du, W.-G. (2022).  
665 Ancient demographics determine the effectiveness of genetic purging in endangered  
666 lizards. *Molecular Biology and Evolution*, 39(1), msab359. doi:  
667 10.1093/molbev/msab359

668 **Data Availability**

669 Code for all bioinformatic analyses available at [https://github.com/avril-m-](https://github.com/avril-m-harder/roh_inference_testing)  
670 [harder/roh\\_inference\\_testing](https://github.com/kennethb22/roh_parameter_project_kk) and [https://github.com/kennethb22/roh\\_parameter\\_project\\_kk](https://github.com/kennethb22/roh_parameter_project_kk). All  
671 FASTA files for simulated individuals and final VCF files (for simulated and empirical data and  
672 all coverage levels) will be uploaded to a public repository upon manuscript acceptance.

673 **Author Contributions**

674 AMH and JRW conceived the study. AMH, KBK, and SM performed data analyses. AMH wrote  
675 the manuscript with input and final approval from all authors.

676 **Figure Captions**

677 **Figure 1.** Both BCFtools methods underestimate true  $F_{ROH}$  whereas PLINK produces  
678 overestimates. A-C) True vs. called  $F_{ROH}$  for each method and level of coverage. Each regression  
679 line represents linear model results for a single level of coverage with the shaded areas  
680 representing 95% confidence intervals. Each point represents data for a single simulated  
681 individual; dashed line is 1:1 line. For PLINK, increasing coverage increases  $F_{ROH}$  estimation  
682 accuracy, whereas accuracy decreases for both BCFtools approaches.

683 **Figure 2.** Increasing coverage from 5X to 10X can have significant effects on  $F_{ROH}$  estimates. A-  
684 C) True and inferred  $F_{ROH}$  values for simulated data and D-F) inferred  $F_{ROH}$  values for empirical  
685 data at varying coverage levels for all three methods. True mean  $F_{ROH}$  values for simulated data  
686 are indicated by horizontal dashed line. For the simulated data, error bars are bootstrapped 95%

687 CIs and points represent mean values (n=100); lines for 15 randomly subsampled individuals are  
688 displayed for simplicity (all individual data presented in Fig. S1). For the empirical results,  
689 points represent mean values (n=15) and error bars correspond to 95% CIs. Across methods and  
690 data types, mean  $F_{ROH}$  decreases from 5X to 10X, with significant differences detected when  
691 simulated data are analyzed with PLINK and for all three methods applied to the empirical data.

692 **Figure 3.** PLINK outperforms BCFtools with respect to false negative rates, but underperforms  
693 with respect to false positive rates. A) False positive (*i.e.*, calling a ROH that was not present in  
694 an individual) and B) false negative (*i.e.*, failing to call a ROH present in an individual) rates for  
695 simulated data across coverage levels and methods. Horizontal lines indicate median values and  
696 shaded boxes are 50% quantiles. Note difference in scale of y-axis between panels A and B. Both  
697 BCFtools approaches outperform PLINK with respect to false positive rates but the reverse is  
698 true for false negative rates. Increasing coverage corresponds to decreasing false positive rates  
699 and to increasing false negative rates.

700 **Figure 4.** True and called ROH positions for a ~6-Mb window in one exemplar individual.  
701 Evidence of false negative and false positive calls can be seen across all methods and coverage  
702 levels, and the lumping issue (*i.e.*, the erroneous combining of multiple true ROHs into a single  
703 called ROH) is apparent for BCFtools Genotypes, BCFtools Likelihoods (at 5X coverage), and  
704 PLINK. Full chromosome plots are provided for three individuals in Fig. S2.

705 **Figure 5.** BCFtools Likelihoods produces more accurate length-specific  $F_{ROH}$  estimates than  
706 BCFtools Genotypes or PLINK (but see the Discussion for additional context of this result). A-  
707 C) Called  $F_{ROH}$  – true  $F_{ROH}$  across methods, ROH length bins, and coverage levels. Dashed  
708 horizontal line is at  $y = 0$  and values above this line indicate overestimation of  $F_{ROH}$  whereas

709 values below this line indicate underestimation. Length bins were defined as: (i)  $100 \text{ kb} \geq$  short  
710 ROHs  $< 250 \text{ kb}$ ; (ii)  $250 \text{ kb} \leq$  intermediate ROHs  $< 500 \text{ kb}$ ; (iii)  $500 \text{ kb} \geq$  long ROHs  $< 1 \text{ Mb}$ ;  
711 (iv)  $1 \text{ Mb} \geq$  very long ROHs. D) Histograms for bin-specific true  $F_{\text{ROH}}$  values (*i.e.*, total  
712 frequencies sum to 100 individuals within each plot). Despite very few very long ROHs present  
713 in simulated individuals, PLINK and BCFtools Genotypes consistently overestimate  $F_{\text{ROH}}$  for  
714 this bin. All individual data for called  $F_{\text{ROH}}$  – true  $F_{\text{ROH}}$  are presented in Fig. S2.

715 **Figure 6.** For BCFtools Genotypes and PLINK (and BCFtools Likelihoods at low coverage),  
716 multiple true ROHs are increasingly lumped into single called ROHs with increasing true ROH  
717 length. A) Illustration of relationships between true ROHs and the called ROHs they are often  
718 lumped into. B-E) Number of true ROHs lumped into a single called ROH for each ROH length  
719 bin, method, and coverage level. Total number of called ROHs falling into each length bin is  
720 provided in the upper right corner of each panel. Degree of circle transparency corresponds to the  
721 number of called ROHs matching that particular  $y$ -value. Transparency levels are normalized to  
722 the total number of called ROHs within each panel (all methods and coverage levels combined).  
723 Diamonds represent mean values. A simplified version of this figure showing trends in mean  
724 values is provided in Fig. S4. Lumping patterns can also be seen in Figs. 4 and S2.

725 **Figure 7.** For the empirical data, PLINK tends to call more short ROHs than the BCFtools  
726 approaches whereas BCFtools Genotypes tends to call more intermediate to very long ROHs  
727 than the other two methods. ROH length-specific  $F_{\text{ROH}}$  values for A) short, B) intermediate, C)  
728 long, and D) very long ROHs. Length bins were defined as: (i)  $100 \text{ kb} \leq$  short ROHs  $< 500 \text{ kb}$ ;  
729 (ii)  $500 \text{ kb} \leq$  intermediate ROHs  $< 1 \text{ Mb}$ ; (iii)  $1 \text{ Mb} \geq$  long ROHs  $< 2 \text{ Mb}$ ; (iv)  $2 \text{ Mb} \geq$  very long  
730 ROHs. Points correspond to mean values and error bars are 95% CIs. Across all methods and



- 731 ROH length bins,  $F_{\text{ROH}}$  estimates at 5X coverage are significantly different from estimates at all  
732 other coverage levels within each method and ROH length bin combination.

**Table 1.** Parameter values applied during ROH calling for both simulated and empirical data. For PLINK, a total of 486 combinations were tested. PLINK default values are underlined. ROH = run of homozygosity.

| Program      | Parameter                  | Abbreviation | Values                  | Description                                                                                                                                               |
|--------------|----------------------------|--------------|-------------------------|-----------------------------------------------------------------------------------------------------------------------------------------------------------|
| BCFtools/RoH | --GTs-only                 | --           | 30                      | If set, uses genotypes only and ignores likelihood values                                                                                                 |
| PLINK        | --homozyg-window-het       | phwh         | 0, <u>1</u> , 2         | Number of heterozygous sites allowed within a window; default = 1 heterozygous site                                                                       |
|              | --homozyg-window-missing   | phwm         | 2, <u>5</u> , 50        | Number of missing calls allowed in a window; default = 5 missing calls                                                                                    |
|              | --homozyg-window-snp       | phws         | <u>50</u> , 100, 1000   | Scanning window length in SNPs; default = 50 SNPs                                                                                                         |
|              | --homozyg-density          | phzd         | <u>50</u>               | Minimum density in kb ( <i>i.e.</i> , maximum inverse density (kb/variant); <i>e.g.</i> , to specify minimum 1 SNP per 50 kb, set to 50); default = 50 kb |
|              | --homozyg-gap              | phzg         | 500, <u>1000</u>        | Threshold distance in kb at which to split a ROH into two if two SNPs are too far apart; default = 1000 kb                                                |
|              | --homozyg-window-threshold | phwt         | 0.01, <u>0.05</u> , 0.1 | Proportion of overlapping windows that must be called homozygous to assign any SNP to a ROH; default = 0.05                                               |
|              | --homozyg-snp              | phzs         | 10, <u>100</u> , 1000   | Minimum number of variants that must be included in a ROH of minimum length --homozyg-kb to report it; default = 100 SNPs                                 |
|              | --homozyg-kb               | phzk         | 100                     | Required minimum length of sequence (in kb) spanned by number of homozygous sites specified by --homozyg-snp; default = 1000 kb                           |

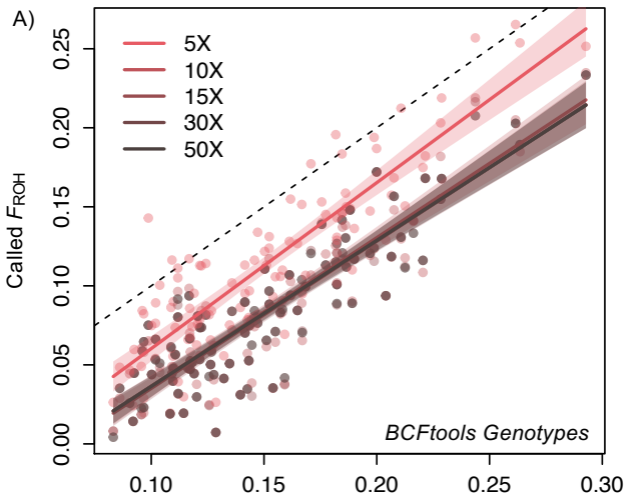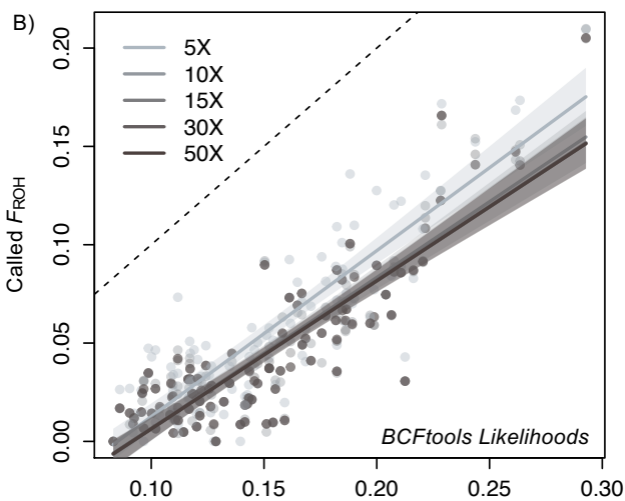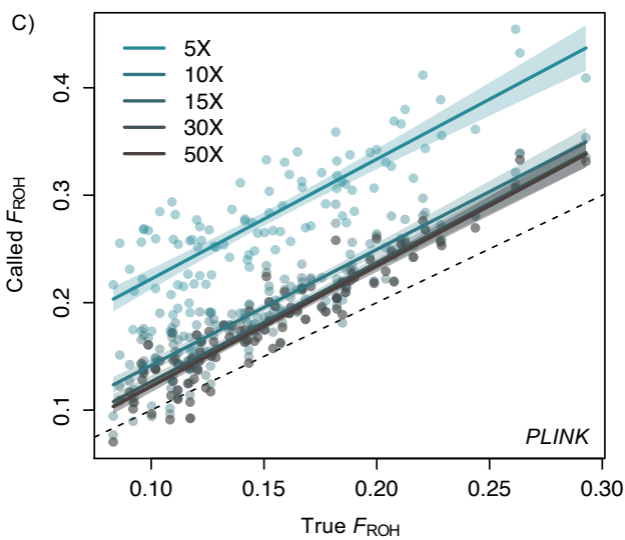

Simulated data

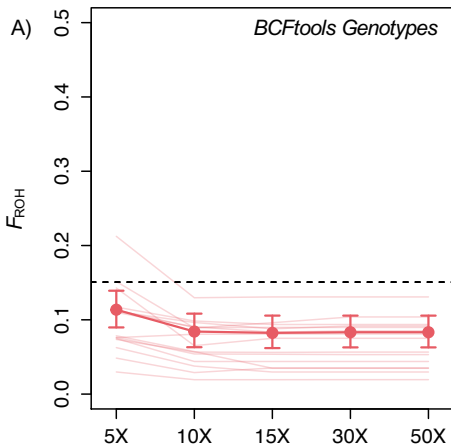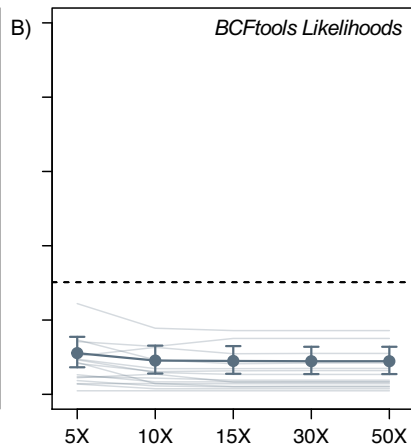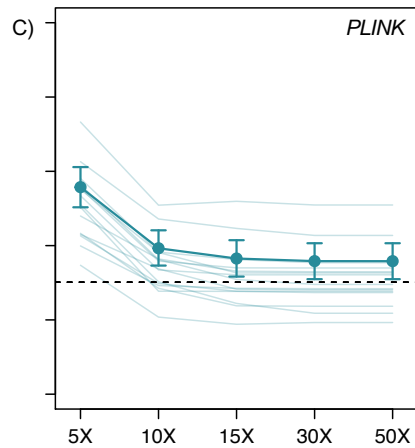

Empirical data

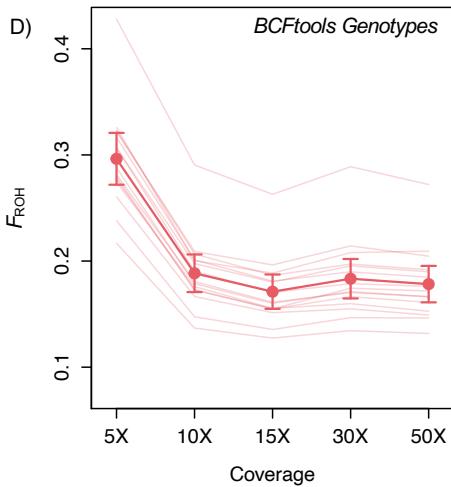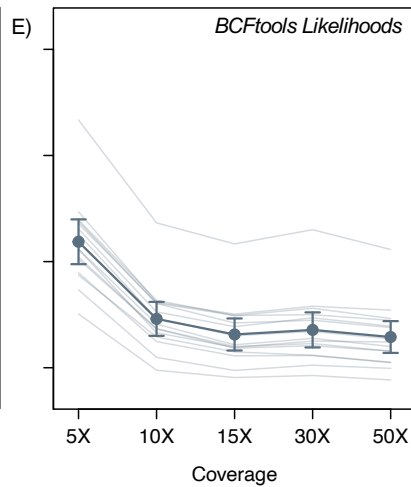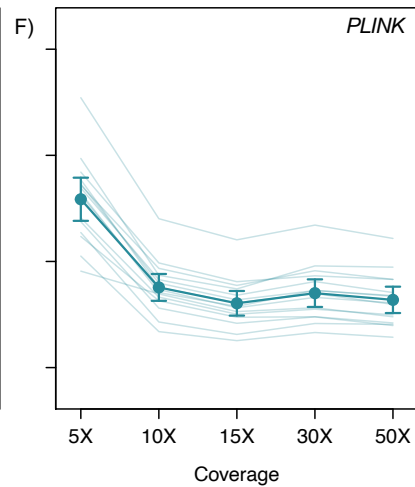

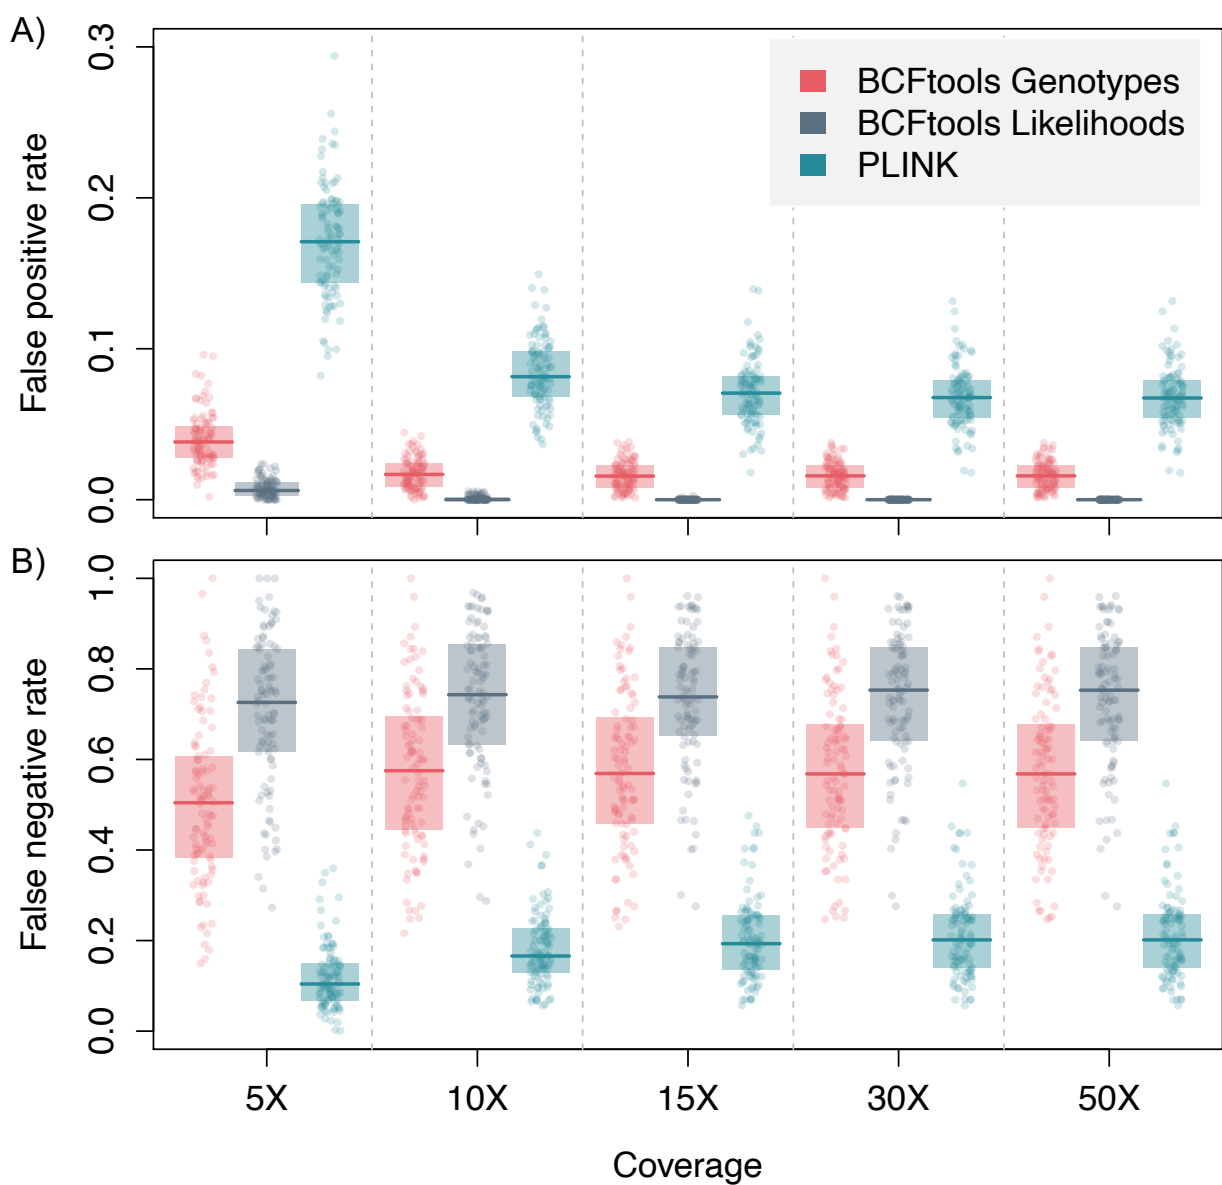

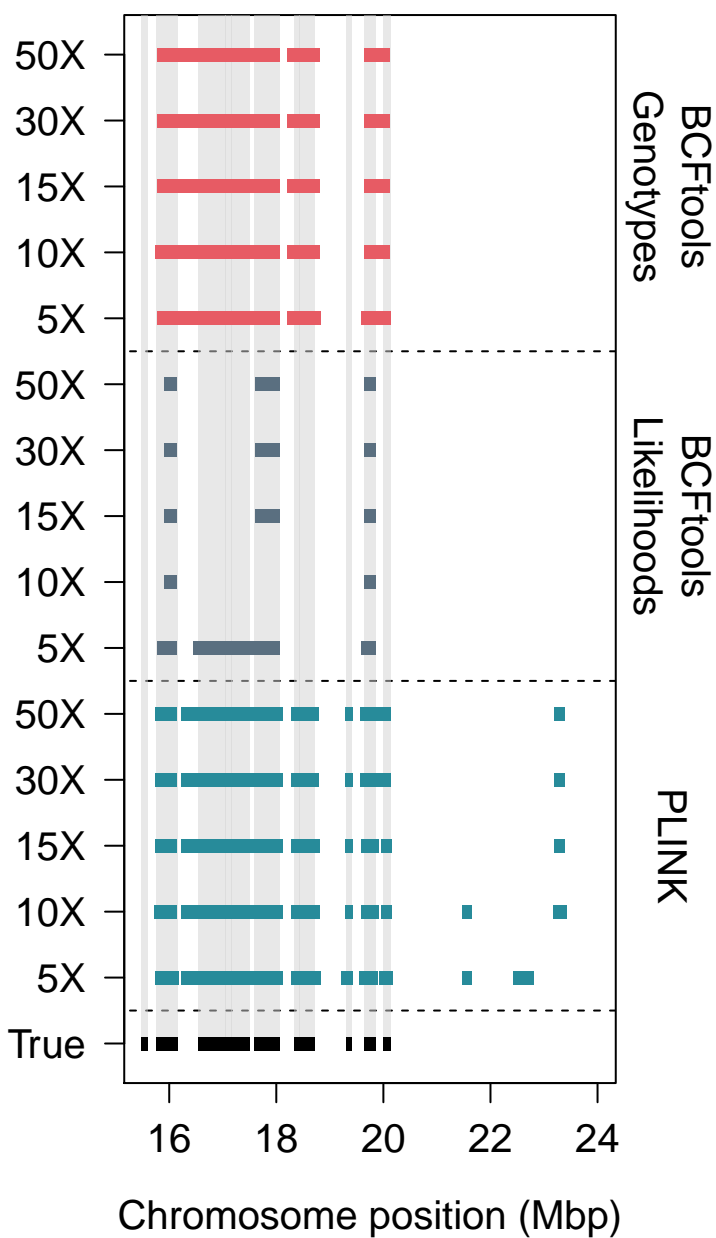

A) *BCFtools* Genotypes

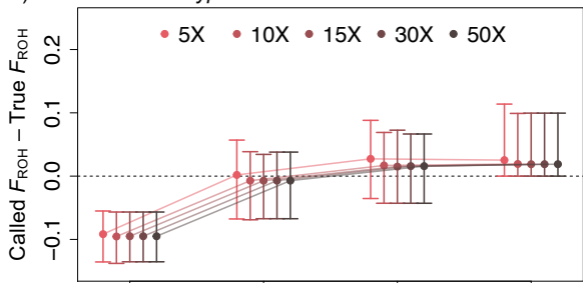

B) *BCFtools* Likelihoods

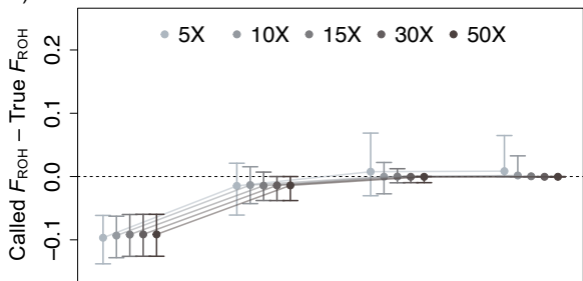

C) *PLINK*

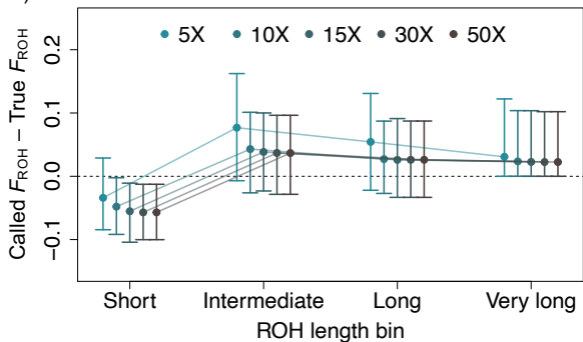

D)

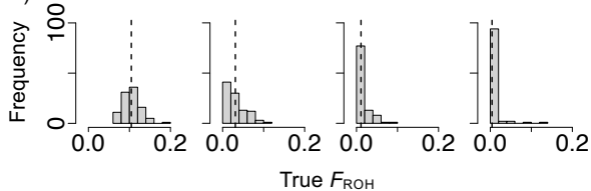

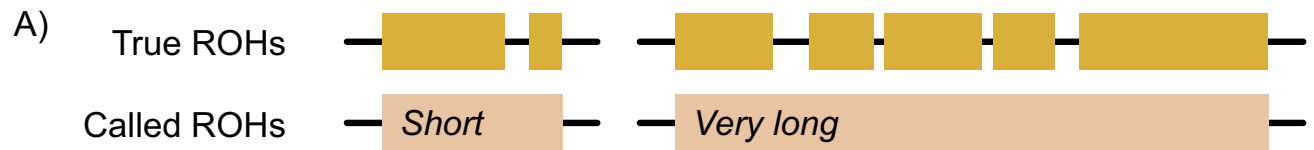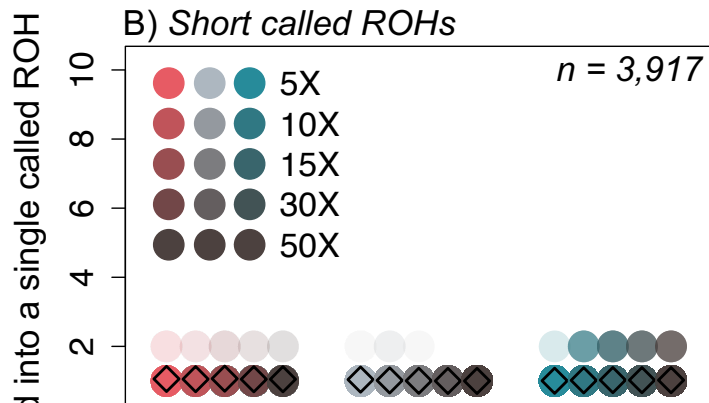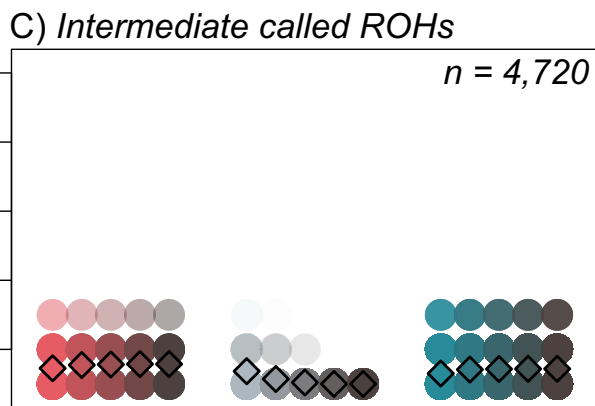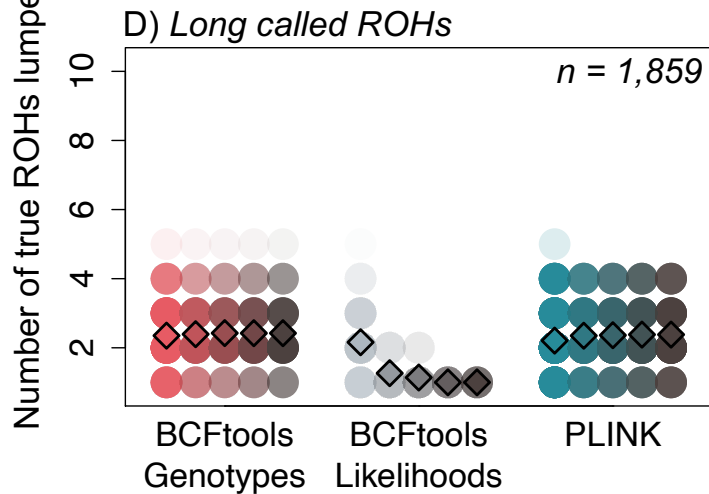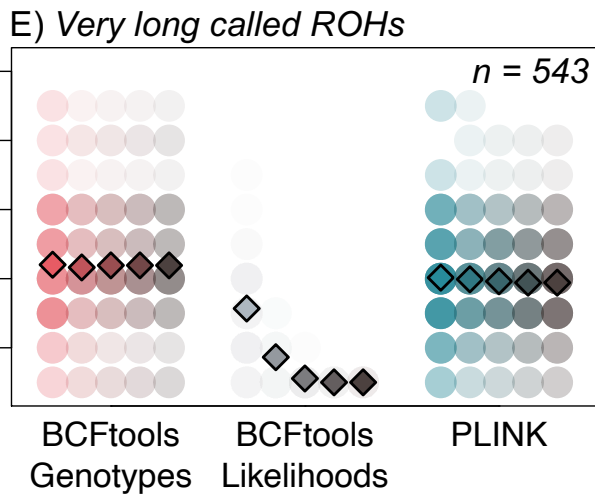



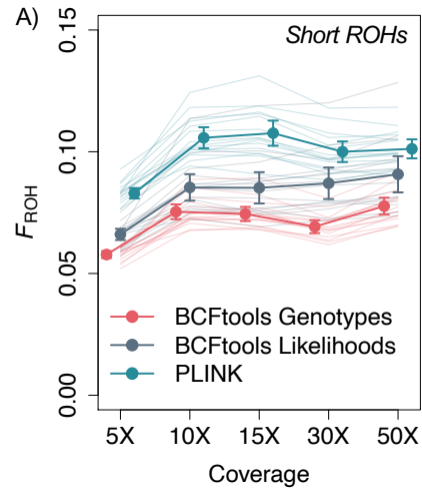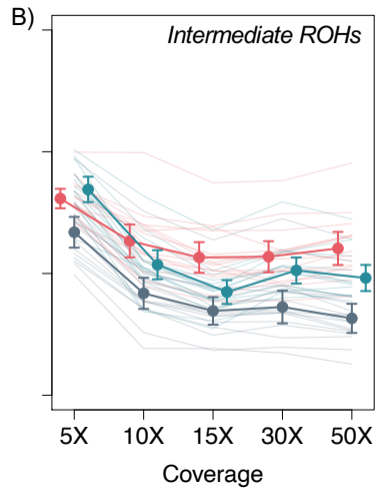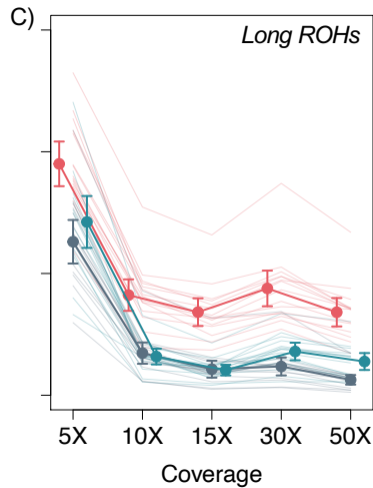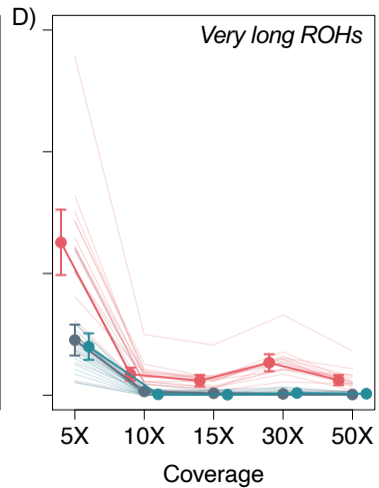

## Box 1. PLINK parameter exploration through sensitivity analysis

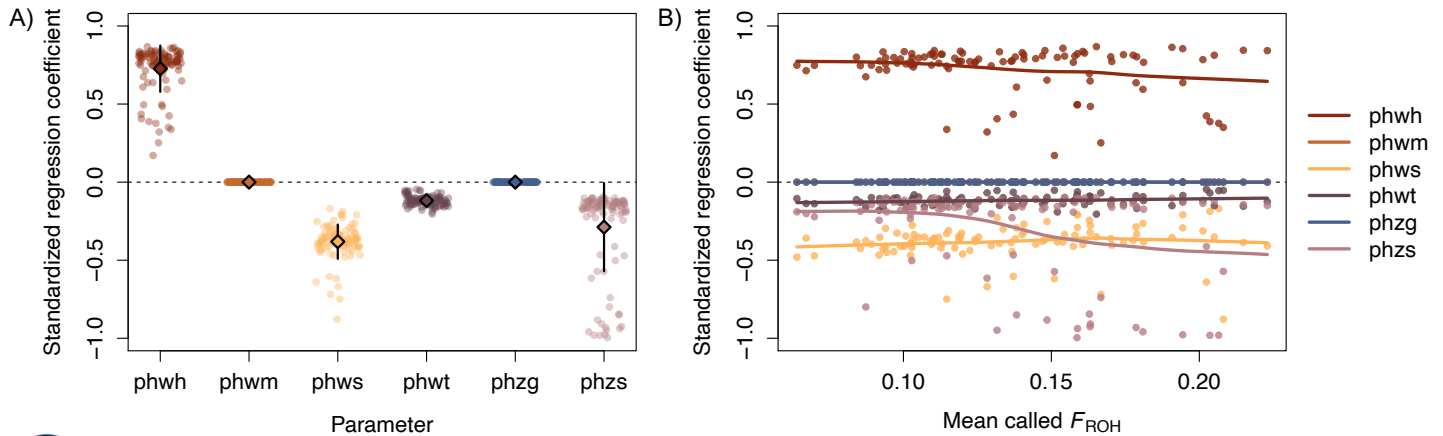

1

| Parameter | Values tested           |
|-----------|-------------------------|
| phwh      | 0, <u>1</u> , 2         |
| phwm      | 2, <u>5</u> , 50        |
| phws      | <u>50</u> , 100, 1000   |
| phzg      | 500, <u>1000</u>        |
| phwt      | 0.01, <u>0.05</u> , 0.1 |
| phzs      | 10, <u>100</u> , 1000   |

When considering which PLINK parameter values to apply to your data, it is important to determine how individual variation across samples interacts with specific parameter values to influence  $F_{ROH}$  estimates. Herein, we demonstrate how we applied sensitivity analysis to select a set of parameter values for our simulated data (downsampled to 15X). In panel A, standardized regression coefficient (SRC) values are plotted for each parameter, with values SRC values  $> 0$  indicating that increasing the value of a parameter increases mean called  $F_{ROH}$  (in the plot, each point corresponds to a single individual). In panel B, SRC values are plotted across mean called  $F_{ROH}$  values to show how the relationship between SRC and  $F_{ROH}$  changes with  $F_{ROH}$ . The parameter values tested are provided in the table at left, with the default PLINK settings underlined.

Parameter descriptions are provided in Table 1.

For **phwh** in Iteration 1, SRC values were  $> 0$ , indicating a positive effect on  $F_{ROH}$  (panel A), with the effect slightly weakening at higher called  $F_{ROH}$  values (trendline in panel B). Allowing zero heterozygous calls within a window would discard many windows due to genotyping error, so we conservatively retained the lowest setting  $> 0$  for this parameter, setting it to 1 to avoid inflated  $F_{ROH}$  values. Varying **phwm**, **phwt**, and **phzg** had nearly no effect on  $F_{ROH}$ , so we retained default values for these parameters. The variable effects of changing **phws** and **phzs** across individuals (i.e., the vertical spread of points in panel A and B) indicate that we should further explore these parameter values, because appropriate values for sliding window length and minimum number of sites per ROH are data-dependent, and thus, value selection will differentially affect ROH estimates due to individual variation in genetic architecture and sequencing errors. We first tested large values (e.g.,  $\geq 500$  for **phws** and  $\geq 200$  for **phzs**) and found that these settings result in no ROH calls for many individuals (Table S2). We next tested two sets of values near the default value for **phws** and a more narrow range of values near the default value for **phzs** than in Iteration 1.

2

| Parameter | Values tested            |
|-----------|--------------------------|
| phws      | <u>50</u> , 75, 100, 125 |
| phzs      | 50, 75, <u>100</u> , 125 |

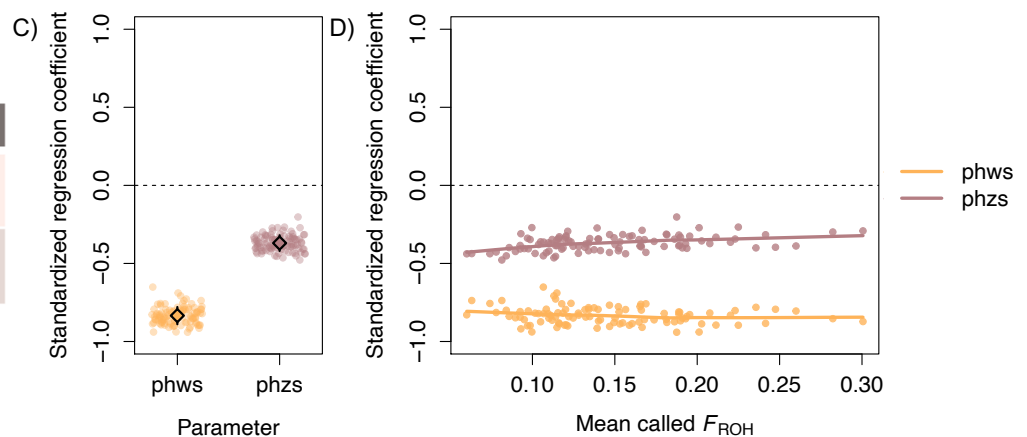

In Iteration 2, we tested values at the smaller end of the ranges tested for **phws** in Iteration 1. For the values tested, increasing **phws** still had a negative effect on  $F_{ROH}$ , but the effect was somewhat constant across  $F_{ROH}$  values (panels C and D). Increasing **phzs** also corresponds to decreased  $F_{ROH}$ , but compared to Iteration 1, the variation in that effect across individuals was much smaller (panels C and D). For both **phws** and **phzs**, these results indicate that selecting a value somewhere within the tested range is unlikely to have substantial sample-specific impacts on called  $F_{ROH}$  values.

In Iteration 3, we tested slightly higher values for **phws** than in Iteration 2. Although this change minimized the effect that varying the value of **phzs** has on  $F_{ROH}$ , variation in the effects of **phws** settings across individuals increased substantially when compared with Iteration 2. In this iteration, mean called  $F_{ROH}$  values have also shifted towards zero, indicating that increasing **phws** to the tested values may be leading to some ROHs not being called in some individuals. Based on this comparison with the Iteration 2 results, we opted to retain the default values for both **phws** and **phzs**, which were included in the Iteration 2 tested values.

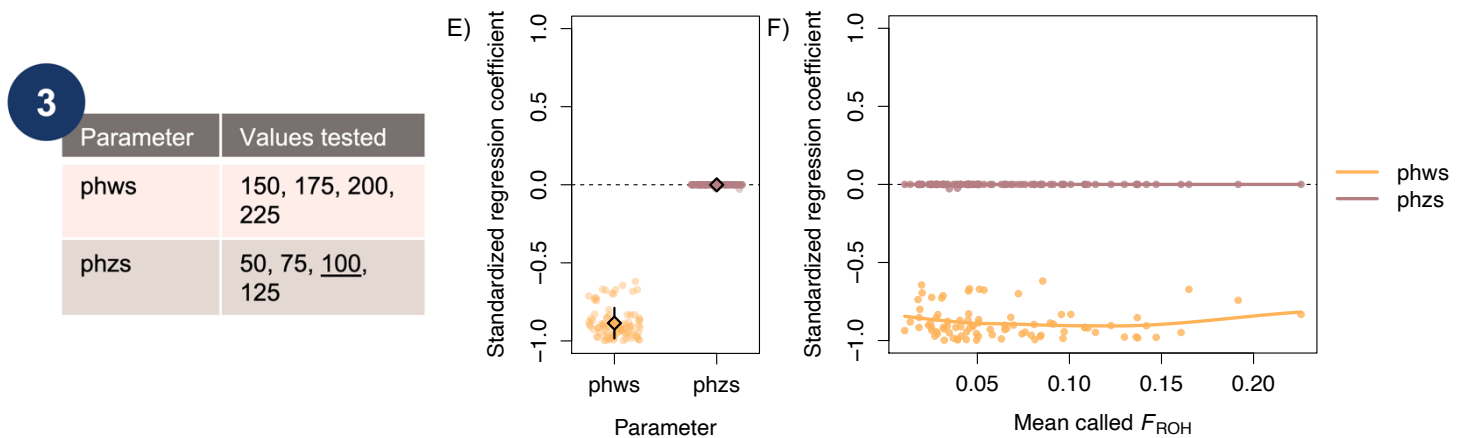

Because we tested this approach on simulated data, we can also examine the relationship between true  $F_{ROH}$  values and SRCs. For Iteration 2 (the set of values we retained for all downstream analyses), although increasing the values of both **phws** and **phzs** decreased called  $F_{ROH}$ , there is no consistent pattern in variation across individuals as true  $F_{ROH}$  varies and the variation is small. For Iteration 3, however, there is substantial individual variation in how varying values of **phws** affect called  $F_{ROH}$ . This variation is likely due to variation in individuals' true ROH length distributions, with individuals with a greater proportion of short ROHs more strongly affected by increasing **phws**. This is also reflected in lower mean values for called  $F_{ROH}$  relative to true  $F_{ROH}$  (panel J; vertical lines are  $\pm 1$  SD).

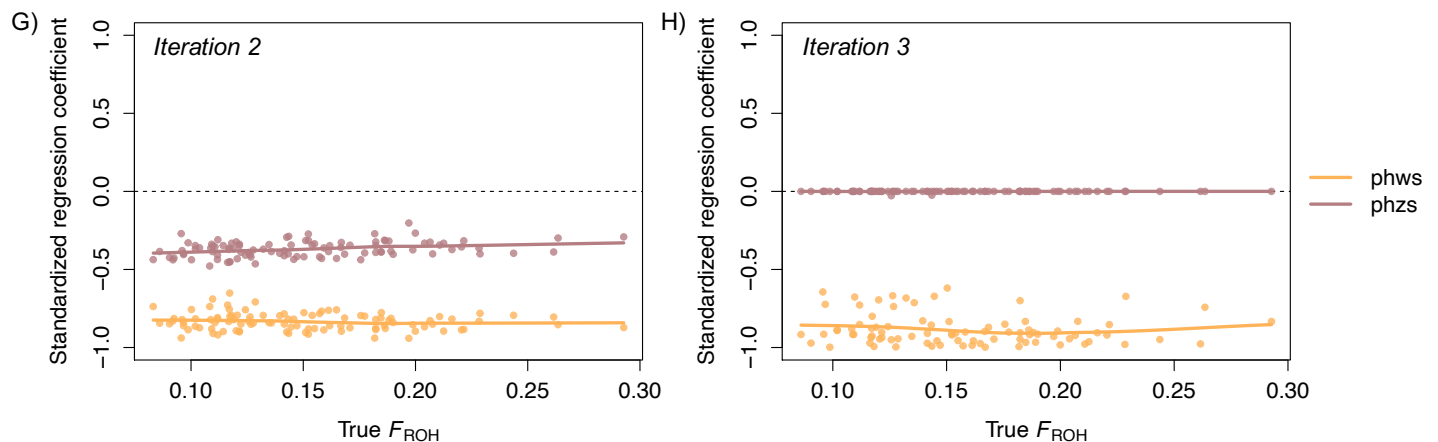

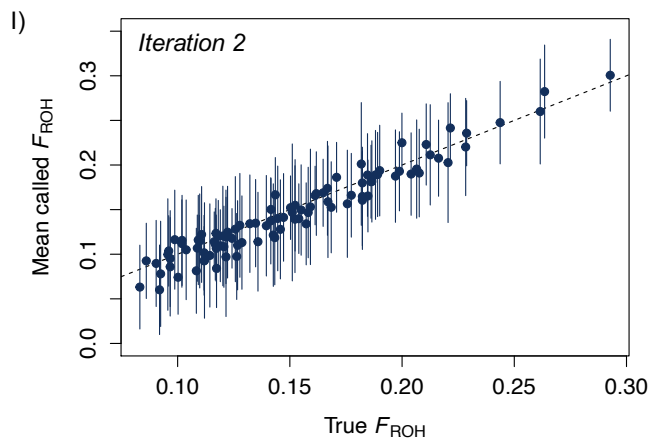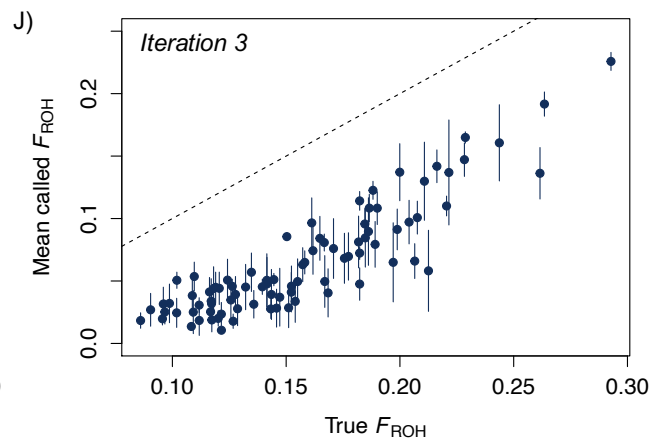

Source: https://www.biorxiv.org/content/10.1101/2022.09.29.510155v1.full.pdf
